# Supplementary material for: Correlation between hypoxia-inducible factor-1α C1772T/G1790A polymorphisms and head and neck cancer risk: a meta-analysis
Source: PubMed Central journal article supplement (PMC8278760; doi:10.1186/s12957-021-02324-0), 2021-07-13
Supplement: 12957_2021_2324_MOESM1_ESM.pdf [file 12957_2021_2324_MOESM1_ESM.pdf]

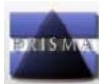

# PRISMA 2009 Checklist

| Section/topic       | #    | Checklist item                                                                                                                                                                                                                                                                                                                                                                                                                                                                                                                                                                                                                                                                                                                                                                                                                                                                                                                                                                                                                                                                                                                                                                                                                                                                                                                                                                                                                                                                                                                                   | Reported on page # |                   |         |              |                   |          |              |       |          |             |                   |        |  |  |  |  |  |  |    |    |    |    |    |    |  |  |        |  |  |  |  |  |  |  |  |  |  |  |  |  |  |  |          |      |       |       |            |    |       |    |   |   |    |   |   |      |       |  |          |      |        |           |          |    |       |   |   |    |   |    |   |      |        |  |               |      |       |           |          |    |         |    |    |    |     |    |   |                   |       |  |  |
|---------------------|------|--------------------------------------------------------------------------------------------------------------------------------------------------------------------------------------------------------------------------------------------------------------------------------------------------------------------------------------------------------------------------------------------------------------------------------------------------------------------------------------------------------------------------------------------------------------------------------------------------------------------------------------------------------------------------------------------------------------------------------------------------------------------------------------------------------------------------------------------------------------------------------------------------------------------------------------------------------------------------------------------------------------------------------------------------------------------------------------------------------------------------------------------------------------------------------------------------------------------------------------------------------------------------------------------------------------------------------------------------------------------------------------------------------------------------------------------------------------------------------------------------------------------------------------------------|--------------------|-------------------|---------|--------------|-------------------|----------|--------------|-------|----------|-------------|-------------------|--------|--|--|--|--|--|--|----|----|----|----|----|----|--|--|--------|--|--|--|--|--|--|--|--|--|--|--|--|--|--|--|----------|------|-------|-------|------------|----|-------|----|---|---|----|---|---|------|-------|--|----------|------|--------|-----------|----------|----|-------|---|---|----|---|----|---|------|--------|--|---------------|------|-------|-----------|----------|----|---------|----|----|----|-----|----|---|-------------------|-------|--|--|
| <b>TITLE</b>        |      |                                                                                                                                                                                                                                                                                                                                                                                                                                                                                                                                                                                                                                                                                                                                                                                                                                                                                                                                                                                                                                                                                                                                                                                                                                                                                                                                                                                                                                                                                                                                                  |                    |                   |         |              |                   |          |              |       |          |             |                   |        |  |  |  |  |  |  |    |    |    |    |    |    |  |  |        |  |  |  |  |  |  |  |  |  |  |  |  |  |  |  |          |      |       |       |            |    |       |    |   |   |    |   |   |      |       |  |          |      |        |           |          |    |       |   |   |    |   |    |   |      |        |  |               |      |       |           |          |    |         |    |    |    |     |    |   |                   |       |  |  |
| Title               | 1    | Correlation between hypoxia-inducible factor-1 $\alpha$ polymorphisms and head and neck cancer risk                                                                                                                                                                                                                                                                                                                                                                                                                                                                                                                                                                                                                                                                                                                                                                                                                                                                                                                                                                                                                                                                                                                                                                                                                                                                                                                                                                                                                                              |                    |                   |         |              |                   |          |              |       |          |             |                   |        |  |  |  |  |  |  |    |    |    |    |    |    |  |  |        |  |  |  |  |  |  |  |  |  |  |  |  |  |  |  |          |      |       |       |            |    |       |    |   |   |    |   |   |      |       |  |          |      |        |           |          |    |       |   |   |    |   |    |   |      |        |  |               |      |       |           |          |    |         |    |    |    |     |    |   |                   |       |  |  |
| <b>ABSTRACT</b>     |      |                                                                                                                                                                                                                                                                                                                                                                                                                                                                                                                                                                                                                                                                                                                                                                                                                                                                                                                                                                                                                                                                                                                                                                                                                                                                                                                                                                                                                                                                                                                                                  |                    |                   |         |              |                   |          |              |       |          |             |                   |        |  |  |  |  |  |  |    |    |    |    |    |    |  |  |        |  |  |  |  |  |  |  |  |  |  |  |  |  |  |  |          |      |       |       |            |    |       |    |   |   |    |   |   |      |       |  |          |      |        |           |          |    |       |   |   |    |   |    |   |      |        |  |               |      |       |           |          |    |         |    |    |    |     |    |   |                   |       |  |  |
| Structured summary  | 2    | <p><b>Abstract</b></p> <p><b>Objective:</b> We performed a meta-analysis to explore the role of hypoxia-inducible factor-1<math>\alpha</math> (HIF-1<math>\alpha</math>) C1772T/G1790A polymorphisms in the progress of head and neck cancer (HNC).</p> <p><b>Materials and Methods:</b> PubMed, Embase and Web of Science databases were used to retrieve the eligible published papers. Pooled odds ratios (ORs) and corresponding 95% confidence intervals (CIs) were used to evaluate the correlation strength.</p> <p><b>Results:</b> Our results demonstrated that HIF-1<math>\alpha</math> C1772T polymorphism was significantly related to an increased HNC risk (OR=2.27, 95%CI=1.17-4.42 for homozygous model; OR=11.53, 95%CI=1.11-120.4 for recessive model), especially exists in Caucasians (OR=2.16, 95%CI=1.09-4.27 for homozygous model; OR=2.28, 95%CI=1.15-5.51 for recessive model). Similarly, the remarkable correlation was discovered between G1790A polymorphism and HNC risk (OR=72.11, 95%CI=2.08-2502.4 for homozygous model; OR=58.05, 95%CI=1.70-1985.77 for recessive model). Moreover, in the subgroup analysis by source of controls, a statistically significant correlation was discovered in population-based (PB) subgroup, but not in hospital-based (HB) subgroup.</p> <p><b>Conclusion:</b> Our study demonstrated that both HIF-1<math>\alpha</math> C1772T and G1790A polymorphisms might be strongly related to the higher risk of HNC, especially among Caucasian group for C1772T polymorphism.</p> |                    |                   |         |              |                   |          |              |       |          |             |                   |        |  |  |  |  |  |  |    |    |    |    |    |    |  |  |        |  |  |  |  |  |  |  |  |  |  |  |  |  |  |  |          |      |       |       |            |    |       |    |   |   |    |   |   |      |       |  |          |      |        |           |          |    |       |   |   |    |   |    |   |      |        |  |               |      |       |           |          |    |         |    |    |    |     |    |   |                   |       |  |  |
| <b>INTRODUCTION</b> |      |                                                                                                                                                                                                                                                                                                                                                                                                                                                                                                                                                                                                                                                                                                                                                                                                                                                                                                                                                                                                                                                                                                                                                                                                                                                                                                                                                                                                                                                                                                                                                  |                    |                   |         |              |                   |          |              |       |          |             |                   |        |  |  |  |  |  |  |    |    |    |    |    |    |  |  |        |  |  |  |  |  |  |  |  |  |  |  |  |  |  |  |          |      |       |       |            |    |       |    |   |   |    |   |   |      |       |  |          |      |        |           |          |    |       |   |   |    |   |    |   |      |        |  |               |      |       |           |          |    |         |    |    |    |     |    |   |                   |       |  |  |
| Rationale           | 3    | Our study demonstrated that both HIF-1 $\alpha$ C1772T and G1790A polymorphisms might be strongly related to the higher risk of HNC, especially among Caucasian group for C1772T polymorphism.                                                                                                                                                                                                                                                                                                                                                                                                                                                                                                                                                                                                                                                                                                                                                                                                                                                                                                                                                                                                                                                                                                                                                                                                                                                                                                                                                   |                    |                   |         |              |                   |          |              |       |          |             |                   |        |  |  |  |  |  |  |    |    |    |    |    |    |  |  |        |  |  |  |  |  |  |  |  |  |  |  |  |  |  |  |          |      |       |       |            |    |       |    |   |   |    |   |   |      |       |  |          |      |        |           |          |    |       |   |   |    |   |    |   |      |        |  |               |      |       |           |          |    |         |    |    |    |     |    |   |                   |       |  |  |
| Objectives          | 4    | <p>Participants: head and neck cancer</p> <p>Interventions: T(C1772T); A(G1790A)</p> <p>Comparisons: C(C1772T); G(G1790A)</p> <p>Outcomes:</p> <table border="1"> <thead> <tr> <th>First Author</th> <th>Year</th> <th>Country</th> <th>Ethnicity</th> <th>Genotyping Method</th> <th>SC</th> <th>Case-Control</th> <th>Cases</th> <th>Controls</th> <th>Cancer Type</th> <th>HWE</th> </tr> <tr> <th colspan="7"></th> <th>CC</th> <th>CT</th> <th>TT</th> <th>CC</th> <th>CT</th> <th>TT</th> <th colspan="2"></th> </tr> </thead> <tbody> <tr> <td>C1772T</td> <td></td> </tr> <tr> <td>Prasad J</td> <td>2018</td> <td>India</td> <td>Asian</td> <td>Sequencing</td> <td>HB</td> <td>50/50</td> <td>43</td> <td>7</td> <td>0</td> <td>42</td> <td>8</td> <td>0</td> <td>OSCC</td> <td>0.539</td> <td></td> </tr> <tr> <td>Alves LR</td> <td>2012</td> <td>Brazil</td> <td>Brazilian</td> <td>PCR-RFLP</td> <td>PB</td> <td>40/88</td> <td>0</td> <td>1</td> <td>39</td> <td>0</td> <td>85</td> <td>3</td> <td>OSCC</td> <td>&lt;0.001</td> <td></td> </tr> <tr> <td>Mera-Menendez</td> <td>2012</td> <td>Spain</td> <td>Caucasian</td> <td>PCR-RFLP</td> <td>HB</td> <td>118/148</td> <td>85</td> <td>18</td> <td>15</td> <td>113</td> <td>27</td> <td>8</td> <td>Glottic laryngeal</td> <td>0.001</td> <td></td> </tr> </tbody> </table>                                                        | First Author       | Year              | Country | Ethnicity    | Genotyping Method | SC       | Case-Control | Cases | Controls | Cancer Type | HWE               |        |  |  |  |  |  |  | CC | CT | TT | CC | CT | TT |  |  | C1772T |  |  |  |  |  |  |  |  |  |  |  |  |  |  |  | Prasad J | 2018 | India | Asian | Sequencing | HB | 50/50 | 43 | 7 | 0 | 42 | 8 | 0 | OSCC | 0.539 |  | Alves LR | 2012 | Brazil | Brazilian | PCR-RFLP | PB | 40/88 | 0 | 1 | 39 | 0 | 85 | 3 | OSCC | <0.001 |  | Mera-Menendez | 2012 | Spain | Caucasian | PCR-RFLP | HB | 118/148 | 85 | 18 | 15 | 113 | 27 | 8 | Glottic laryngeal | 0.001 |  |  |
| First Author        | Year | Country                                                                                                                                                                                                                                                                                                                                                                                                                                                                                                                                                                                                                                                                                                                                                                                                                                                                                                                                                                                                                                                                                                                                                                                                                                                                                                                                                                                                                                                                                                                                          | Ethnicity          | Genotyping Method | SC      | Case-Control | Cases             | Controls | Cancer Type  | HWE   |          |             |                   |        |  |  |  |  |  |  |    |    |    |    |    |    |  |  |        |  |  |  |  |  |  |  |  |  |  |  |  |  |  |  |          |      |       |       |            |    |       |    |   |   |    |   |   |      |       |  |          |      |        |           |          |    |       |   |   |    |   |    |   |      |        |  |               |      |       |           |          |    |         |    |    |    |     |    |   |                   |       |  |  |
|                     |      |                                                                                                                                                                                                                                                                                                                                                                                                                                                                                                                                                                                                                                                                                                                                                                                                                                                                                                                                                                                                                                                                                                                                                                                                                                                                                                                                                                                                                                                                                                                                                  |                    |                   |         |              | CC                | CT       | TT           | CC    | CT       | TT          |                   |        |  |  |  |  |  |  |    |    |    |    |    |    |  |  |        |  |  |  |  |  |  |  |  |  |  |  |  |  |  |  |          |      |       |       |            |    |       |    |   |   |    |   |   |      |       |  |          |      |        |           |          |    |       |   |   |    |   |    |   |      |        |  |               |      |       |           |          |    |         |    |    |    |     |    |   |                   |       |  |  |
| C1772T              |      |                                                                                                                                                                                                                                                                                                                                                                                                                                                                                                                                                                                                                                                                                                                                                                                                                                                                                                                                                                                                                                                                                                                                                                                                                                                                                                                                                                                                                                                                                                                                                  |                    |                   |         |              |                   |          |              |       |          |             |                   |        |  |  |  |  |  |  |    |    |    |    |    |    |  |  |        |  |  |  |  |  |  |  |  |  |  |  |  |  |  |  |          |      |       |       |            |    |       |    |   |   |    |   |   |      |       |  |          |      |        |           |          |    |       |   |   |    |   |    |   |      |        |  |               |      |       |           |          |    |         |    |    |    |     |    |   |                   |       |  |  |
| Prasad J            | 2018 | India                                                                                                                                                                                                                                                                                                                                                                                                                                                                                                                                                                                                                                                                                                                                                                                                                                                                                                                                                                                                                                                                                                                                                                                                                                                                                                                                                                                                                                                                                                                                            | Asian              | Sequencing        | HB      | 50/50        | 43                | 7        | 0            | 42    | 8        | 0           | OSCC              | 0.539  |  |  |  |  |  |  |    |    |    |    |    |    |  |  |        |  |  |  |  |  |  |  |  |  |  |  |  |  |  |  |          |      |       |       |            |    |       |    |   |   |    |   |   |      |       |  |          |      |        |           |          |    |       |   |   |    |   |    |   |      |        |  |               |      |       |           |          |    |         |    |    |    |     |    |   |                   |       |  |  |
| Alves LR            | 2012 | Brazil                                                                                                                                                                                                                                                                                                                                                                                                                                                                                                                                                                                                                                                                                                                                                                                                                                                                                                                                                                                                                                                                                                                                                                                                                                                                                                                                                                                                                                                                                                                                           | Brazilian          | PCR-RFLP          | PB      | 40/88        | 0                 | 1        | 39           | 0     | 85       | 3           | OSCC              | <0.001 |  |  |  |  |  |  |    |    |    |    |    |    |  |  |        |  |  |  |  |  |  |  |  |  |  |  |  |  |  |  |          |      |       |       |            |    |       |    |   |   |    |   |   |      |       |  |          |      |        |           |          |    |       |   |   |    |   |    |   |      |        |  |               |      |       |           |          |    |         |    |    |    |     |    |   |                   |       |  |  |
| Mera-Menendez       | 2012 | Spain                                                                                                                                                                                                                                                                                                                                                                                                                                                                                                                                                                                                                                                                                                                                                                                                                                                                                                                                                                                                                                                                                                                                                                                                                                                                                                                                                                                                                                                                                                                                            | Caucasian          | PCR-RFLP          | HB      | 118/148      | 85                | 18       | 15           | 113   | 27       | 8           | Glottic laryngeal | 0.001  |  |  |  |  |  |  |    |    |    |    |    |    |  |  |        |  |  |  |  |  |  |  |  |  |  |  |  |  |  |  |          |      |       |       |            |    |       |    |   |   |    |   |   |      |       |  |          |      |        |           |          |    |       |   |   |    |   |    |   |      |        |  |               |      |       |           |          |    |         |    |    |    |     |    |   |                   |       |  |  |

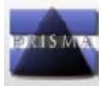

# PRISMA 2009 Checklist

|  |  |                                   |      |        |           |            |    |         |     |    |     |     |    |     |                          |       |
|--|--|-----------------------------------|------|--------|-----------|------------|----|---------|-----|----|-----|-----|----|-----|--------------------------|-------|
|  |  | F                                 |      |        |           |            |    |         |     |    |     |     |    |     | cancer                   |       |
|  |  | Shieh TM                          | 2010 | China  | Asian     | Sequencing | HB | 305/96  | 282 | 23 | 0   | 89  | 7  | 0   | OSCC                     | 0.711 |
|  |  | Chen MK                           | 2009 | China  | Asian     | PCR-RFLP   | PB | 174/347 | 163 | 10 | 1   | 334 | 13 | 0   | OC                       | 0.722 |
|  |  | Munoz-Guerra MF                   | 2009 | Spain  | Caucasion | PCR-RFLP   | PB | 70/148  | 57  | 6  | 7   | 113 | 27 | 8   | OSCC                     | 0.001 |
|  |  | Tanimoto K                        | 2003 | Japan  | Asian     | Sequencing | PB | 55/110  | 45  | 10 | 0   | 98  | 12 | 0   | HNSCC                    | 0.545 |
|  |  | G1790A                            |      |        |           |            |    |         | AA  | AG | GG  | AA  | AG | GG  |                          |       |
|  |  | Alves LR                          | 2012 | Brazil | Brazilian | PCR-RFLP   | PB | 40/88   | 37  | 1  | 2   | 0   | 7  | 81  | OSCC                     | 0.698 |
|  |  | Mera-Menendez F                   | 2012 | Spain  | Caucasion | PCR-RFLP   | HB | 111/139 | 0   | 4  | 107 | 0   | 9  | 130 | Glottic laryngeal cancer | 0.693 |
|  |  | Shieh TM                          | 2010 | China  | Asian     | Sequencing | HB | 305/96  | 0   | 24 | 281 | 0   | 7  | 89  | OSCC                     | 0.711 |
|  |  | Chen MK                           | 2009 | China  | Asian     | PCR-RFLP   | PB | 174/347 | 1   | 20 | 153 | 0   | 14 | 333 | OC                       | 0.701 |
|  |  | Munoz-Guerra MF                   | 2009 | Spain  | Caucasion | PCR-RFLP   | PB | 64/139  | 3   | 21 | 40  | 0   | 9  | 130 | OSCC                     | 0.693 |
|  |  | Tanimoto K                        | 2003 | Japan  | Asian     | Sequencing | PB | 55/110  | 0   | 4  | 51  | 0   | 9  | 101 | HNSCC                    | 0.655 |
|  |  | Study design: case-control study. |      |        |           |            |    |         |     |    |     |     |    |     |                          |       |

## METHODS

|                           |   |                                                                                                                                                                               |      |         |           |                   |    |              |       |    |    |          |    |    |                          |        |
|---------------------------|---|-------------------------------------------------------------------------------------------------------------------------------------------------------------------------------|------|---------|-----------|-------------------|----|--------------|-------|----|----|----------|----|----|--------------------------|--------|
| Protocol and registration | 5 | Indicate if a review protocol exists, if and where it can be accessed (e.g., Web address), and, if available, provide registration information including registration number. |      |         |           |                   |    |              |       |    |    |          |    |    |                          |        |
| Eligibility criteria      | 6 | First Author                                                                                                                                                                  | Year | Country | Ethnicity | Genotyping Method | SC | Case-Control | Cases |    |    | Controls |    |    | Cancer Type              | HWE    |
|                           |   | C1772T                                                                                                                                                                        |      |         |           |                   |    |              | CC    | CT | TT | CC       | CT | TT |                          |        |
|                           |   | Prasad J                                                                                                                                                                      | 2018 | India   | Asian     | Sequencing        | HB | 50/50        | 43    | 7  | 0  | 42       | 8  | 0  | OSCC                     | 0.539  |
|                           |   | Alves LR                                                                                                                                                                      | 2012 | Brazil  | Brazilian | PCR-RFLP          | PB | 40/88        | 0     | 1  | 39 | 0        | 85 | 3  | OSCC                     | <0.001 |
|                           |   | Mera-Menendez F                                                                                                                                                               | 2012 | Spain   | Caucasion | PCR-RFLP          | HB | 118/148      | 85    | 18 | 15 | 113      | 27 | 8  | Glottic laryngeal cancer | 0.001  |
|                           |   | Shieh TM                                                                                                                                                                      | 2010 | China   | Asian     | Sequencing        | HB | 305/96       | 282   | 23 | 0  | 89       | 7  | 0  | OSCC                     | 0.711  |
|                           |   | Chen MK                                                                                                                                                                       | 2009 | China   | Asian     | PCR-RFLP          | PB | 174/347      | 163   | 10 | 1  | 334      | 13 | 0  | OC                       | 0.722  |
|                           |   | Munoz-Guerra MF                                                                                                                                                               | 2009 | Spain   | Caucasion | PCR-RFLP          | PB | 70/148       | 57    | 6  | 7  | 113      | 27 | 8  | OSCC                     | 0.001  |
|                           |   | Tanimoto K                                                                                                                                                                    | 2003 | Japan   | Asian     | Sequencing        | PB | 55/110       | 45    | 10 | 0  | 98       | 12 | 0  | HNSCC                    | 0.545  |
|                           |   | G1790A                                                                                                                                                                        |      |         |           |                   |    |              | AA    | AG | GG | AA       | AG | GG |                          |        |

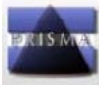

# PRISMA 2009 Checklist

|                     |   |                                                                                                                                                                                                                                                                                                                                                                                                                                                                                                                                                                                                                                                                                                                                                                                                                                       |  |
|---------------------|---|---------------------------------------------------------------------------------------------------------------------------------------------------------------------------------------------------------------------------------------------------------------------------------------------------------------------------------------------------------------------------------------------------------------------------------------------------------------------------------------------------------------------------------------------------------------------------------------------------------------------------------------------------------------------------------------------------------------------------------------------------------------------------------------------------------------------------------------|--|
|                     |   | <p>Alves LR 2012 Brazil Brazilian PCR-RFLP PB 40/88 37 1 2 0 7 81 OSCC 0.698</p> <p>Mera-Menendez F 2012 Spain Caucasian PCR-RFLP HB 111/139 0 4 107 0 9 130 Glottic laryngeal cancer 0.693</p> <p>Shieh TM 2010 China Asian Sequencing HB 305/96 0 24 281 0 7 89 OSCC 0.711</p> <p>Chen MK 2009 China Asian PCR-RFLP PB 174/347 1 20 153 0 14 333 OC 0.701</p> <p>Munoz-Guerra MF 2009 Spain Caucasian PCR-RFLP PB 64/139 3 21 40 0 9 130 OSCC 0.693</p> <p>Tanimoto K 2003 Japan Asian Sequencing PB 55/110 0 4 51 0 9 101 HNSCC 0.655</p>                                                                                                                                                                                                                                                                                          |  |
| Information sources | 7 | PubMed, Embase and Web of Science databases were used to retrieve the eligible published papers.                                                                                                                                                                                                                                                                                                                                                                                                                                                                                                                                                                                                                                                                                                                                      |  |
| Search              | 8 | A computerized literature search was conducted by the databases of PubMed, Embase and Web of Science for identifying the qualified studies with the following terms: 'hif-1 $\alpha$ ' or 'hypoxia-inducible factor-1 $\alpha$ ' or 'hif-1' or 'hypoxia-inducible factor-1' And 'mutation' or 'mutations' or 'variants' or 'variant' or 'polymorphism' or 'polymorphisms' And 'carcinoma' or 'neoplasm' or 'tumor' or 'cancer' or 'carcinogenesis' And 'head and neck' or 'HNC' or 'oral' or 'oral cavity' or 'pharyngeal' or 'laryngeal' or 'laryngopharyngeal' or 'hypopharyngeal' or 'nasopharyngeal' or 'oropharyngeal'. Finally, we scanned references cited by all the included studies to identify eligible studies.                                                                                                           |  |
| Study selection     | 9 | <p><b>PRISMA 2009 Flow Diagram</b></p> <p>The diagram illustrates the study selection process across four stages: Identification, Screening, Eligibility, and Included.</p> <ul style="list-style-type: none"> <li><b>Identification:</b> 150 records identified through database searching.</li> <li><b>Screening:</b> 94 records after duplicates removed.</li> <li><b>Eligibility:</b> 94 records screened. 61 titles and abstracts were excluded. 33 full-text articles were assessed for eligibility.</li> <li><b>Included:</b> 26 full-text articles were excluded for the following reasons: 9 reviews, 11 with no comparison needed, 2 unable to extract enough information, and 4 others. 7 studies were included in qualitative synthesis and 7 studies were included in quantitative synthesis (meta-analysis).</li> </ul> |  |

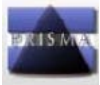

# PRISMA 2009 Checklist

|                                    |    |                                                                                                                                                                                       |  |
|------------------------------------|----|---------------------------------------------------------------------------------------------------------------------------------------------------------------------------------------|--|
| Data collection process            | 10 | Three authors are responsible for extracting data and two authors are responsible for verifying the correctness of the data.                                                          |  |
| Data items                         | 11 | Data have already been shown in the article.                                                                                                                                          |  |
| Risk of bias in individual studies | 12 | OHAT risk of bias rating tool was applied to evaluate the bias risk of the included articles.<br>Publication bias analysis and sensitivity analysis have been performed in our study. |  |
| Summary measures                   | 13 | State the principal summary measures (e.g., risk ratio, difference in means).                                                                                                         |  |
| Synthesis of results               | 14 | Results have already been shown in the article.                                                                                                                                       |  |

| Section/topic               | #  | Checklist item                                                 |
|-----------------------------|----|----------------------------------------------------------------|
| Risk of bias across studies | 15 | No publication bias was found.                                 |
| Additional analyses         | 16 | Sensitivity and subgroup analyses were performed in our study. |

## RESULTS

|                 |    |                                                                                                                                                                                                                                                                                                                                                                                                                                                                                                                                                                                                                                                                                                                                                                                                                                                                                                                                                                                                                                                                                                                                                                                                                                                                                                                                                                                                                                                    |
|-----------------|----|----------------------------------------------------------------------------------------------------------------------------------------------------------------------------------------------------------------------------------------------------------------------------------------------------------------------------------------------------------------------------------------------------------------------------------------------------------------------------------------------------------------------------------------------------------------------------------------------------------------------------------------------------------------------------------------------------------------------------------------------------------------------------------------------------------------------------------------------------------------------------------------------------------------------------------------------------------------------------------------------------------------------------------------------------------------------------------------------------------------------------------------------------------------------------------------------------------------------------------------------------------------------------------------------------------------------------------------------------------------------------------------------------------------------------------------------------|
| Study selection | 17 | <p><b>PRISMA 2009 Flow Diagram</b></p> <p>The flow diagram illustrates the study selection process across four stages: Identification, Screening, Eligibility, and Included. In the Identification stage, 150 records were identified through database searching. In the Screening stage, 94 records remained after duplicates were removed, and 94 records were screened. 61 titles and abstracts were excluded. In the Eligibility stage, 33 full-text articles were assessed for eligibility. 26 full-text articles were excluded for the following reasons: 9 were reviews, 11 had no comparison needed, 2 had insufficient information for extraction, and 4 were others. Finally, 7 studies were included in both qualitative and quantitative synthesis.</p> <pre> graph TD     A[Records identified through database searching (n = 150)] --&gt; B[Records after duplicates removed (n = 94)]     B --&gt; C[Records screened (n = 94)]     C --&gt; D[Titles and abstracts excluded (n = 61)]     C --&gt; E[Full-text articles assessed for eligibility (n = 33)]     E --&gt; F[Full-text articles excluded, with reasons (n = 26):<br/>1. Review (n = 9)<br/>2. No comparison needed (n = 11)<br/>3. Unable to extract enough information (n = 2)<br/>4. Others (n = 4)]     E --&gt; G[Studies included in qualitative synthesis (n = 7)]     G --&gt; H[Studies included in quantitative synthesis (meta-analysis) (n = 7)]   </pre> |
|-----------------|----|----------------------------------------------------------------------------------------------------------------------------------------------------------------------------------------------------------------------------------------------------------------------------------------------------------------------------------------------------------------------------------------------------------------------------------------------------------------------------------------------------------------------------------------------------------------------------------------------------------------------------------------------------------------------------------------------------------------------------------------------------------------------------------------------------------------------------------------------------------------------------------------------------------------------------------------------------------------------------------------------------------------------------------------------------------------------------------------------------------------------------------------------------------------------------------------------------------------------------------------------------------------------------------------------------------------------------------------------------------------------------------------------------------------------------------------------------|



# PRISMA 2009 Checklist

Study characteristics

18

**Table 1** The detailed information of included articles

| First Author    | Year | Country | Ethnicity | Genotyping Method | SC | Case-Control | Cases |    |     | Controls |    |     | Cancer Type              | H   |
|-----------------|------|---------|-----------|-------------------|----|--------------|-------|----|-----|----------|----|-----|--------------------------|-----|
|                 |      |         |           |                   |    |              | CC    | CT | TT  | CC       | CT | TT  |                          |     |
| Prasad J        | 2018 | India   | Asian     | Sequencing        | HB | 50/50        | 43    | 7  | 0   | 42       | 8  | 0   | OSCC                     | 0.  |
| Alves LR        | 2012 | Brazil  | Brazilian | PCR-RFLP          | PB | 40/88        | 0     | 1  | 39  | 0        | 85 | 3   | OSCC                     | <0. |
| Mera-Menendez F | 2012 | Spain   | Caucasion | PCR-RFLP          | HB | 118/148      | 85    | 18 | 15  | 113      | 27 | 8   | Glottic laryngeal cancer | 0.  |
| Shieh TM        | 2010 | China   | Asian     | Sequencing        | HB | 305/96       | 282   | 23 | 0   | 89       | 7  | 0   | OSCC                     | 0.  |
| Chen MK         | 2009 | China   | Asian     | PCR-RFLP          | PB | 174/347      | 163   | 10 | 1   | 334      | 13 | 0   | OC                       | 0.  |
| Munoz-Guerra MF | 2009 | Spain   | Caucasion | PCR-RFLP          | PB | 70/148       | 57    | 6  | 7   | 113      | 27 | 8   | OSCC                     | 0.  |
| Tanimoto K      | 2003 | Japan   | Asian     | Sequencing        | PB | 55/110       | 45    | 10 | 0   | 98       | 12 | 0   | HNSCC                    | 0.  |
|                 |      |         |           |                   |    |              | AA    | AG | GG  | AA       | AG | GG  |                          |     |
| Alves LR        | 2012 | Brazil  | Brazilian | PCR-RFLP          | PB | 40/88        | 37    | 1  | 2   | 0        | 7  | 81  | OSCC                     | 0.  |
| Mera-Menendez F | 2012 | Spain   | Caucasion | PCR-RFLP          | HB | 111/139      | 0     | 4  | 107 | 0        | 9  | 130 | Glottic laryngeal cancer | 0.  |
| Shieh TM        | 2010 | China   | Asian     | Sequencing        | HB | 305/96       | 0     | 24 | 281 | 0        | 7  | 89  | OSCC                     | 0.  |
| Chen MK         | 2009 | China   | Asian     | PCR-RFLP          | PB | 174/347      | 1     | 20 | 153 | 0        | 14 | 333 | OC                       | 0.  |
| Munoz-Guerra MF | 2009 | Spain   | Caucasion | PCR-RFLP          | PB | 64/139       | 3     | 21 | 40  | 0        | 9  | 130 | OSCC                     | 0.  |
| Tanimoto K      | 2003 | Japan   | Asian     | Sequencing        | PB | 55/110       | 0     | 4  | 51  | 0        | 9  | 101 | HNSCC                    | 0.  |

FA: First author; SC: source of control; OC: oral cancer; NC: nasopharyngeal carcinoma; HNC: head and neck cancer; HB: hospital-based study; PB: population-based study; HW: Hardy Weinberg equilibrium; PCR-RFLP: polymerase chain reaction-restriction fragment length polymorphism; PCR: polymerase chain reaction

[28] Munoz-Guerra, M. F., Fernandez-Contreras, M. E., Moreno, A. L., Martin, I. D., Herraes, B., & Gamallo, C. (2009). Polymorphisms in hypoxia inducible factor 1-alpha and the impact on the prognosis of early stages of oral cancer. *Ann Surg Oncol*, 16(8), 2351-2358. doi: 10.1245/s10434-009-0503-8

[30] Tanimoto, K., Yoshiga, K., Eguchi, H., Kaneyasu, M., Ukon, K., Kumazaki, T., . . . Nishiyama, M. (2003). Hypoxia-inducible factor-1 polymorphisms associated with enhanced transactivation capacity, implying clinical significance. *Carcinogenesis*, 24(11), 1779-1784. doi: 10.1093/carcin/bgg132

[32] Prasad, J., Goswami, B., Gowda, S. H., Gupta, N., Kumar, S., Agarwal, K., . . . Chauhan, A. (2018). Does Hypoxia-Inducible Factor-1 (HIF-1alpha) C1772T polymorphism predict short-term prognosis in patients with oral squamous cell carcinoma (OSCC)? *J Oral Pathol Med*, 47(7), 660-664. doi: 10.1111/jop.12718

[33] Shieh, T. M., Chang, K. W., Tu, H. F., Shih, Y. H., Ko, S. Y., Chen, Y. C., & Liu, C. J. (2010). Association between the polymorphisms in exon 12 of hypoxia-inducible factor-1alpha and the clinicopathological features of oral squamous cell carcinoma. *Oral Oncol*, 46(9), e47-51. doi: 10.1016/j.oraloncology.2010.04.009

[34] Mera-Menendez, F., Hinojar-Gutierrez, A., Guijarro Rojas, M., de Gregorio, J. G., Mera-Menendez, E., Sanchez, J. J., . . . Gamallo, C. (2012). Polymorphisms in HIF-1alpha affect presence of lymph node metastasis and can influence tumor size in squamous-cell carcinoma of the head and neck. *Oral Oncol*, 18(1), 1-6. doi: 10.1016/j.oraloncology.2011.08.009

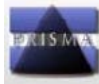

# PRISMA 2009 Checklist

|                               |    | <p>larynx. Clin Transl Oncol, 15(5), 358-363. doi: 10.1007/s12094-012-0930-z</p> <p>[35] Chen, M. K., Chiou, H. L., Su, S. C., Chung, T. T., Tseng, H. C., Tsai, H. T., &amp; Yang, S. F. (2009). The association between inducible factor-1alpha gene polymorphisms and increased susceptibility to oral cancer. Oral Oncol, 45(12), e222-223. doi: 10.1016/j.oraloncology.2009.07.015</p> <p>[36] Alves, L. R., Fraga, C. A. C., Oliveira, M. V. M., Sousa, A. A., Jorge, A. S. B., Marques-Silva, L., Santos, S. H. S., . . . Guimarães, J. (2012). High HIF-1α expression genotypes increase odds ratio of oral cancer. Head Neck Oncol 4: 2–7</p>                                                                                                                                                                                                                                                                                                                                                                                                                                                                                                                                                                                                                                                                                                                                                                                                                                                                                                                                                                                                                                                                                                                                                                                                                                                                                                                                                                                                                                                                                                                                                                                                                                                                                                                                                                                                                                                                                                                                                                                                                                                                                                                                                                                                                                                                                                                                                                                                                                                                                                                                                                                                                                                                                                                                                                                                                                                                                                                                                                                                                                                                                                                                                                                                                                                                                                                                                                                                                                                                                                                                                                                                                                                                                                                                                                                                                                                                                                                                                                                                                                                                                                                                                                                                                                                                                                                                                                                                                                                                                                                                                                                                                                                                                                                                                                                                                                                                                                        |            |                  |              |             |                  |              |            |                  |                   |            |                  |                   |             |  |                   |  |    |       |                  |    |         |                  |    |         |                  |    |         |                  |    |         |         |   |      |           |       |      |           |       |      |           |       |      |           |       |       |            |          |   |      |           |       |      |           |       |      |           |       |      |           |       |       |            |            |   |      |           |       |   |   |   |      |           |       |      |           |       |   |   |           |   |      |           |       |      |           |       |      |           |       |      |           |       |      |           |       |   |      |           |       |   |   |   |      |           |       |      |           |       |   |   |    |   |      |           |       |   |   |   |      |           |       |      |           |       |   |   |    |   |      |           |       |      |           |       |      |           |       |      |           |       |       |             |    |   |      |           |       |      |           |       |      |           |       |      |           |       |       |             |        |    |            |  |  |              |  |  |              |  |  |                   |  |  |                   |  |    |       |                  |    |         |                  |    |         |                  |    |         |                  |    |         |         |   |      |            |       |       |             |       |      |           |       |      |            |       |       |             |          |   |      |           |       |       |             |       |      |           |       |      |            |       |       |             |            |   |      |           |       |   |   |   |      |           |       |      |           |       |   |   |           |   |      |            |       |   |   |   |      |            |       |      |            |       |   |   |       |   |      |           |       |   |   |   |      |           |       |      |           |       |   |   |    |   |      |           |       |   |   |   |      |           |       |      |           |       |   |   |    |   |      |           |       |       |             |       |      |           |       |      |            |       |       |             |    |   |      |            |       |       |             |       |      |           |       |      |            |       |       |             |
|-------------------------------|----|---------------------------------------------------------------------------------------------------------------------------------------------------------------------------------------------------------------------------------------------------------------------------------------------------------------------------------------------------------------------------------------------------------------------------------------------------------------------------------------------------------------------------------------------------------------------------------------------------------------------------------------------------------------------------------------------------------------------------------------------------------------------------------------------------------------------------------------------------------------------------------------------------------------------------------------------------------------------------------------------------------------------------------------------------------------------------------------------------------------------------------------------------------------------------------------------------------------------------------------------------------------------------------------------------------------------------------------------------------------------------------------------------------------------------------------------------------------------------------------------------------------------------------------------------------------------------------------------------------------------------------------------------------------------------------------------------------------------------------------------------------------------------------------------------------------------------------------------------------------------------------------------------------------------------------------------------------------------------------------------------------------------------------------------------------------------------------------------------------------------------------------------------------------------------------------------------------------------------------------------------------------------------------------------------------------------------------------------------------------------------------------------------------------------------------------------------------------------------------------------------------------------------------------------------------------------------------------------------------------------------------------------------------------------------------------------------------------------------------------------------------------------------------------------------------------------------------------------------------------------------------------------------------------------------------------------------------------------------------------------------------------------------------------------------------------------------------------------------------------------------------------------------------------------------------------------------------------------------------------------------------------------------------------------------------------------------------------------------------------------------------------------------------------------------------------------------------------------------------------------------------------------------------------------------------------------------------------------------------------------------------------------------------------------------------------------------------------------------------------------------------------------------------------------------------------------------------------------------------------------------------------------------------------------------------------------------------------------------------------------------------------------------------------------------------------------------------------------------------------------------------------------------------------------------------------------------------------------------------------------------------------------------------------------------------------------------------------------------------------------------------------------------------------------------------------------------------------------------------------------------------------------------------------------------------------------------------------------------------------------------------------------------------------------------------------------------------------------------------------------------------------------------------------------------------------------------------------------------------------------------------------------------------------------------------------------------------------------------------------------------------------------------------------------------------------------------------------------------------------------------------------------------------------------------------------------------------------------------------------------------------------------------------------------------------------------------------------------------------------------------------------------------------------------------------------------------------------------------------------------------------------------------------------------------------------|------------|------------------|--------------|-------------|------------------|--------------|------------|------------------|-------------------|------------|------------------|-------------------|-------------|--|-------------------|--|----|-------|------------------|----|---------|------------------|----|---------|------------------|----|---------|------------------|----|---------|---------|---|------|-----------|-------|------|-----------|-------|------|-----------|-------|------|-----------|-------|-------|------------|----------|---|------|-----------|-------|------|-----------|-------|------|-----------|-------|------|-----------|-------|-------|------------|------------|---|------|-----------|-------|---|---|---|------|-----------|-------|------|-----------|-------|---|---|-----------|---|------|-----------|-------|------|-----------|-------|------|-----------|-------|------|-----------|-------|------|-----------|-------|---|------|-----------|-------|---|---|---|------|-----------|-------|------|-----------|-------|---|---|----|---|------|-----------|-------|---|---|---|------|-----------|-------|------|-----------|-------|---|---|----|---|------|-----------|-------|------|-----------|-------|------|-----------|-------|------|-----------|-------|-------|-------------|----|---|------|-----------|-------|------|-----------|-------|------|-----------|-------|------|-----------|-------|-------|-------------|--------|----|------------|--|--|--------------|--|--|--------------|--|--|-------------------|--|--|-------------------|--|----|-------|------------------|----|---------|------------------|----|---------|------------------|----|---------|------------------|----|---------|---------|---|------|------------|-------|-------|-------------|-------|------|-----------|-------|------|------------|-------|-------|-------------|----------|---|------|-----------|-------|-------|-------------|-------|------|-----------|-------|------|------------|-------|-------|-------------|------------|---|------|-----------|-------|---|---|---|------|-----------|-------|------|-----------|-------|---|---|-----------|---|------|------------|-------|---|---|---|------|------------|-------|------|------------|-------|---|---|-------|---|------|-----------|-------|---|---|---|------|-----------|-------|------|-----------|-------|---|---|----|---|------|-----------|-------|---|---|---|------|-----------|-------|------|-----------|-------|---|---|----|---|------|-----------|-------|-------|-------------|-------|------|-----------|-------|------|------------|-------|-------|-------------|----|---|------|------------|-------|-------|-------------|-------|------|-----------|-------|------|------------|-------|-------|-------------|
| Risk of bias within studies   | 19 | Present data on risk of bias of each study and, if available, any outcome level assessment (see item 12).                                                                                                                                                                                                                                                                                                                                                                                                                                                                                                                                                                                                                                                                                                                                                                                                                                                                                                                                                                                                                                                                                                                                                                                                                                                                                                                                                                                                                                                                                                                                                                                                                                                                                                                                                                                                                                                                                                                                                                                                                                                                                                                                                                                                                                                                                                                                                                                                                                                                                                                                                                                                                                                                                                                                                                                                                                                                                                                                                                                                                                                                                                                                                                                                                                                                                                                                                                                                                                                                                                                                                                                                                                                                                                                                                                                                                                                                                                                                                                                                                                                                                                                                                                                                                                                                                                                                                                                                                                                                                                                                                                                                                                                                                                                                                                                                                                                                                                                                                                                                                                                                                                                                                                                                                                                                                                                                                                                                                                                     |            |                  |              |             |                  |              |            |                  |                   |            |                  |                   |             |  |                   |  |    |       |                  |    |         |                  |    |         |                  |    |         |                  |    |         |         |   |      |           |       |      |           |       |      |           |       |      |           |       |       |            |          |   |      |           |       |      |           |       |      |           |       |      |           |       |       |            |            |   |      |           |       |   |   |   |      |           |       |      |           |       |   |   |           |   |      |           |       |      |           |       |      |           |       |      |           |       |      |           |       |   |      |           |       |   |   |   |      |           |       |      |           |       |   |   |    |   |      |           |       |   |   |   |      |           |       |      |           |       |   |   |    |   |      |           |       |      |           |       |      |           |       |      |           |       |       |             |    |   |      |           |       |      |           |       |      |           |       |      |           |       |       |             |        |    |            |  |  |              |  |  |              |  |  |                   |  |  |                   |  |    |       |                  |    |         |                  |    |         |                  |    |         |                  |    |         |         |   |      |            |       |       |             |       |      |           |       |      |            |       |       |             |          |   |      |           |       |       |             |       |      |           |       |      |            |       |       |             |            |   |      |           |       |   |   |   |      |           |       |      |           |       |   |   |           |   |      |            |       |   |   |   |      |            |       |      |            |       |   |   |       |   |      |           |       |   |   |   |      |           |       |      |           |       |   |   |    |   |      |           |       |   |   |   |      |           |       |      |           |       |   |   |    |   |      |           |       |       |             |       |      |           |       |      |            |       |       |             |    |   |      |            |       |       |             |       |      |           |       |      |            |       |       |             |
| Results of individual studies | 20 | <p align="center"><b>Table 2</b> Results of overall and subgroups analyses for C1772T and G1790A polymorphisms</p> <table border="1"> <thead> <tr> <th rowspan="2">C1772T</th> <th rowspan="2">No</th> <th colspan="3">T versus C</th> <th colspan="3">TT versus CC</th> <th colspan="3">TC versus CC</th> <th colspan="3">TT + TC versus CC</th> <th colspan="2">TT versus TC + CC</th> </tr> <tr> <th>OR</th> <th>95%CI</th> <th>P<sup>(z)</sup></th> <th>OR</th> <th>(95%CI)</th> <th>P<sup>(z)</sup></th> <th>OR</th> <th>(95%CI)</th> <th>P<sup>(z)</sup></th> <th>OR</th> <th>(95%CI)</th> <th>P<sup>(z)</sup></th> <th>OR</th> <th>(95%CI)</th> </tr> </thead> <tbody> <tr> <td>Overall</td> <td>7</td> <td>1.66</td> <td>0.92-2.99</td> <td>0.095</td> <td>2.27</td> <td>1.17-4.42</td> <td>0.016</td> <td>0.98</td> <td>0.70-1.38</td> <td>0.914</td> <td>1.16</td> <td>0.85-1.59</td> <td>0.355</td> <td>11.53</td> <td>1.11-120.4</td> </tr> <tr> <td>PCR-RFLP</td> <td>4</td> <td>2.44</td> <td>0.90-6.64</td> <td>0.081</td> <td>2.27</td> <td>1.17-4.42</td> <td>0.016</td> <td>0.86</td> <td>0.55-1.34</td> <td>0.506</td> <td>1.14</td> <td>0.78-1.67</td> <td>0.503</td> <td>11.53</td> <td>1.11-120.4</td> </tr> <tr> <td>Sequencing</td> <td>3</td> <td>1.20</td> <td>0.70-2.03</td> <td>0.506</td> <td>—</td> <td>—</td> <td>—</td> <td>1.20</td> <td>0.69-2.09</td> <td>0.514</td> <td>1.20</td> <td>0.69-2.09</td> <td>0.514</td> <td>—</td> <td>—</td> </tr> <tr> <td>Caucasian</td> <td>2</td> <td>1.26</td> <td>0.84-1.90</td> <td>0.270</td> <td>2.16</td> <td>1.09-4.27</td> <td>0.028</td> <td>0.69</td> <td>0.40-1.17</td> <td>0.168</td> <td>1.02</td> <td>0.66-1.57</td> <td>0.926</td> <td>2.28</td> <td>1.15-5.51</td> </tr> <tr> <td>Asian</td> <td>4</td> <td>1.37</td> <td>0.88-2.13</td> <td>0.159</td> <td>—</td> <td>—</td> <td>—</td> <td>1.30</td> <td>0.82-2.07</td> <td>0.269</td> <td>1.34</td> <td>0.85-2.12</td> <td>0.213</td> <td>—</td> <td>—</td> </tr> <tr> <td>HB</td> <td>3</td> <td>1.31</td> <td>0.90-1.90</td> <td>0.162</td> <td>—</td> <td>—</td> <td>—</td> <td>0.92</td> <td>0.57-1.48</td> <td>0.736</td> <td>1.13</td> <td>0.73-1.74</td> <td>0.582</td> <td>—</td> <td>—</td> </tr> <tr> <td>PB</td> <td>4</td> <td>2.87</td> <td>0.82-10.0</td> <td>0.099</td> <td>2.01</td> <td>0.75-5.41</td> <td>0.168</td> <td>1.05</td> <td>0.64-1.73</td> <td>0.843</td> <td>1.20</td> <td>0.76-1.89</td> <td>0.442</td> <td>22.82</td> <td>0.28-1887.8</td> </tr> <tr> <td>OC</td> <td>5</td> <td>1.95</td> <td>0.70-5.43</td> <td>0.201</td> <td>2.01</td> <td>0.75-5.41</td> <td>0.168</td> <td>0.89</td> <td>0.57-1.40</td> <td>0.612</td> <td>1.01</td> <td>0.66-1.54</td> <td>0.957</td> <td>22.82</td> <td>0.28-1887.8</td> </tr> </tbody> </table><br><table border="1"> <thead> <tr> <th rowspan="2">G1790A</th> <th rowspan="2">No</th> <th colspan="3">A versus G</th> <th colspan="3">AA versus GG</th> <th colspan="3">AG versus GG</th> <th colspan="3">AA + AG versus GG</th> <th colspan="2">AA versus AG + GG</th> </tr> <tr> <th>OR</th> <th>95%CI</th> <th>P<sup>(z)</sup></th> <th>OR</th> <th>(95%CI)</th> <th>P<sup>(z)</sup></th> <th>OR</th> <th>(95%CI)</th> <th>P<sup>(z)</sup></th> <th>OR</th> <th>(95%CI)</th> <th>P<sup>(z)</sup></th> <th>OR</th> <th>(95%CI)</th> </tr> </thead> <tbody> <tr> <td>Overall</td> <td>6</td> <td>4.11</td> <td>0.84-20.15</td> <td>0.081</td> <td>72.11</td> <td>2.08-2502.4</td> <td>0.018</td> <td>1.94</td> <td>0.83-4.55</td> <td>0.128</td> <td>3.57</td> <td>0.97-13.14</td> <td>0.055</td> <td>58.05</td> <td>1.70-1985.8</td> </tr> <tr> <td>PCR-RFLP</td> <td>4</td> <td>8.39</td> <td>0.98-72.1</td> <td>0.053</td> <td>72.11</td> <td>2.08-2502.4</td> <td>0.018</td> <td>2.81</td> <td>0.91-8.72</td> <td>0.074</td> <td>7.00</td> <td>1.18-41.68</td> <td>0.032</td> <td>58.05</td> <td>1.70-1985.8</td> </tr> <tr> <td>Sequencing</td> <td>2</td> <td>1.01</td> <td>0.50-2.03</td> <td>0.975</td> <td>—</td> <td>—</td> <td>—</td> <td>1.01</td> <td>0.50-2.06</td> <td>0.975</td> <td>1.01</td> <td>0.50-2.06</td> <td>0.975</td> <td>—</td> <td>—</td> </tr> <tr> <td>Caucasian</td> <td>2</td> <td>2.18</td> <td>0.16-30.19</td> <td>0.562</td> <td>—</td> <td>—</td> <td>—</td> <td>2.10</td> <td>0.16-28.19</td> <td>0.577</td> <td>2.24</td> <td>0.15-34.32</td> <td>0.563</td> <td>—</td> <td>—</td> </tr> <tr> <td>Asian</td> <td>3</td> <td>1.59</td> <td>0.67-3.78</td> <td>0.294</td> <td>—</td> <td>—</td> <td>—</td> <td>1.57</td> <td>0.69-3.58</td> <td>0.283</td> <td>1.59</td> <td>0.67-3.76</td> <td>0.290</td> <td>—</td> <td>—</td> </tr> <tr> <td>HB</td> <td>2</td> <td>0.86</td> <td>0.43-1.72</td> <td>0.667</td> <td>—</td> <td>—</td> <td>—</td> <td>0.85</td> <td>0.42-1.73</td> <td>0.660</td> <td>0.85</td> <td>0.42-1.73</td> <td>0.660</td> <td>—</td> <td>—</td> </tr> <tr> <td>PB</td> <td>4</td> <td>9.43</td> <td>1.20-73.9</td> <td>0.033</td> <td>72.11</td> <td>2.08-2502.4</td> <td>0.018</td> <td>3.22</td> <td>1.28-8.08</td> <td>0.013</td> <td>7.83</td> <td>1.48-41.37</td> <td>0.015</td> <td>58.05</td> <td>1.70-1985.8</td> </tr> <tr> <td>OC</td> <td>4</td> <td>9.66</td> <td>1.31-71.15</td> <td>0.026</td> <td>72.11</td> <td>2.08-2502.4</td> <td>0.018</td> <td>3.17</td> <td>1.26-7.92</td> <td>0.014</td> <td>7.92</td> <td>1.58-39.64</td> <td>0.012</td> <td>58.05</td> <td>1.70-1985.8</td> </tr> </tbody> </table> <p>Forest plots were shown in the article.</p> | C1772T     | No               | T versus C   |             |                  | TT versus CC |            |                  | TC versus CC      |            |                  | TT + TC versus CC |             |  | TT versus TC + CC |  | OR | 95%CI | P <sup>(z)</sup> | OR | (95%CI) | P <sup>(z)</sup> | OR | (95%CI) | P <sup>(z)</sup> | OR | (95%CI) | P <sup>(z)</sup> | OR | (95%CI) | Overall | 7 | 1.66 | 0.92-2.99 | 0.095 | 2.27 | 1.17-4.42 | 0.016 | 0.98 | 0.70-1.38 | 0.914 | 1.16 | 0.85-1.59 | 0.355 | 11.53 | 1.11-120.4 | PCR-RFLP | 4 | 2.44 | 0.90-6.64 | 0.081 | 2.27 | 1.17-4.42 | 0.016 | 0.86 | 0.55-1.34 | 0.506 | 1.14 | 0.78-1.67 | 0.503 | 11.53 | 1.11-120.4 | Sequencing | 3 | 1.20 | 0.70-2.03 | 0.506 | — | — | — | 1.20 | 0.69-2.09 | 0.514 | 1.20 | 0.69-2.09 | 0.514 | — | — | Caucasian | 2 | 1.26 | 0.84-1.90 | 0.270 | 2.16 | 1.09-4.27 | 0.028 | 0.69 | 0.40-1.17 | 0.168 | 1.02 | 0.66-1.57 | 0.926 | 2.28 | 1.15-5.51 | Asian | 4 | 1.37 | 0.88-2.13 | 0.159 | — | — | — | 1.30 | 0.82-2.07 | 0.269 | 1.34 | 0.85-2.12 | 0.213 | — | — | HB | 3 | 1.31 | 0.90-1.90 | 0.162 | — | — | — | 0.92 | 0.57-1.48 | 0.736 | 1.13 | 0.73-1.74 | 0.582 | — | — | PB | 4 | 2.87 | 0.82-10.0 | 0.099 | 2.01 | 0.75-5.41 | 0.168 | 1.05 | 0.64-1.73 | 0.843 | 1.20 | 0.76-1.89 | 0.442 | 22.82 | 0.28-1887.8 | OC | 5 | 1.95 | 0.70-5.43 | 0.201 | 2.01 | 0.75-5.41 | 0.168 | 0.89 | 0.57-1.40 | 0.612 | 1.01 | 0.66-1.54 | 0.957 | 22.82 | 0.28-1887.8 | G1790A | No | A versus G |  |  | AA versus GG |  |  | AG versus GG |  |  | AA + AG versus GG |  |  | AA versus AG + GG |  | OR | 95%CI | P <sup>(z)</sup> | OR | (95%CI) | P <sup>(z)</sup> | OR | (95%CI) | P <sup>(z)</sup> | OR | (95%CI) | P <sup>(z)</sup> | OR | (95%CI) | Overall | 6 | 4.11 | 0.84-20.15 | 0.081 | 72.11 | 2.08-2502.4 | 0.018 | 1.94 | 0.83-4.55 | 0.128 | 3.57 | 0.97-13.14 | 0.055 | 58.05 | 1.70-1985.8 | PCR-RFLP | 4 | 8.39 | 0.98-72.1 | 0.053 | 72.11 | 2.08-2502.4 | 0.018 | 2.81 | 0.91-8.72 | 0.074 | 7.00 | 1.18-41.68 | 0.032 | 58.05 | 1.70-1985.8 | Sequencing | 2 | 1.01 | 0.50-2.03 | 0.975 | — | — | — | 1.01 | 0.50-2.06 | 0.975 | 1.01 | 0.50-2.06 | 0.975 | — | — | Caucasian | 2 | 2.18 | 0.16-30.19 | 0.562 | — | — | — | 2.10 | 0.16-28.19 | 0.577 | 2.24 | 0.15-34.32 | 0.563 | — | — | Asian | 3 | 1.59 | 0.67-3.78 | 0.294 | — | — | — | 1.57 | 0.69-3.58 | 0.283 | 1.59 | 0.67-3.76 | 0.290 | — | — | HB | 2 | 0.86 | 0.43-1.72 | 0.667 | — | — | — | 0.85 | 0.42-1.73 | 0.660 | 0.85 | 0.42-1.73 | 0.660 | — | — | PB | 4 | 9.43 | 1.20-73.9 | 0.033 | 72.11 | 2.08-2502.4 | 0.018 | 3.22 | 1.28-8.08 | 0.013 | 7.83 | 1.48-41.37 | 0.015 | 58.05 | 1.70-1985.8 | OC | 4 | 9.66 | 1.31-71.15 | 0.026 | 72.11 | 2.08-2502.4 | 0.018 | 3.17 | 1.26-7.92 | 0.014 | 7.92 | 1.58-39.64 | 0.012 | 58.05 | 1.70-1985.8 |
| C1772T                        | No | T versus C                                                                                                                                                                                                                                                                                                                                                                                                                                                                                                                                                                                                                                                                                                                                                                                                                                                                                                                                                                                                                                                                                                                                                                                                                                                                                                                                                                                                                                                                                                                                                                                                                                                                                                                                                                                                                                                                                                                                                                                                                                                                                                                                                                                                                                                                                                                                                                                                                                                                                                                                                                                                                                                                                                                                                                                                                                                                                                                                                                                                                                                                                                                                                                                                                                                                                                                                                                                                                                                                                                                                                                                                                                                                                                                                                                                                                                                                                                                                                                                                                                                                                                                                                                                                                                                                                                                                                                                                                                                                                                                                                                                                                                                                                                                                                                                                                                                                                                                                                                                                                                                                                                                                                                                                                                                                                                                                                                                                                                                                                                                                                    |            |                  | TT versus CC |             |                  | TC versus CC |            |                  | TT + TC versus CC |            |                  | TT versus TC + CC |             |  |                   |  |    |       |                  |    |         |                  |    |         |                  |    |         |                  |    |         |         |   |      |           |       |      |           |       |      |           |       |      |           |       |       |            |          |   |      |           |       |      |           |       |      |           |       |      |           |       |       |            |            |   |      |           |       |   |   |   |      |           |       |      |           |       |   |   |           |   |      |           |       |      |           |       |      |           |       |      |           |       |      |           |       |   |      |           |       |   |   |   |      |           |       |      |           |       |   |   |    |   |      |           |       |   |   |   |      |           |       |      |           |       |   |   |    |   |      |           |       |      |           |       |      |           |       |      |           |       |       |             |    |   |      |           |       |      |           |       |      |           |       |      |           |       |       |             |        |    |            |  |  |              |  |  |              |  |  |                   |  |  |                   |  |    |       |                  |    |         |                  |    |         |                  |    |         |                  |    |         |         |   |      |            |       |       |             |       |      |           |       |      |            |       |       |             |          |   |      |           |       |       |             |       |      |           |       |      |            |       |       |             |            |   |      |           |       |   |   |   |      |           |       |      |           |       |   |   |           |   |      |            |       |   |   |   |      |            |       |      |            |       |   |   |       |   |      |           |       |   |   |   |      |           |       |      |           |       |   |   |    |   |      |           |       |   |   |   |      |           |       |      |           |       |   |   |    |   |      |           |       |       |             |       |      |           |       |      |            |       |       |             |    |   |      |            |       |       |             |       |      |           |       |      |            |       |       |             |
|                               |    | OR                                                                                                                                                                                                                                                                                                                                                                                                                                                                                                                                                                                                                                                                                                                                                                                                                                                                                                                                                                                                                                                                                                                                                                                                                                                                                                                                                                                                                                                                                                                                                                                                                                                                                                                                                                                                                                                                                                                                                                                                                                                                                                                                                                                                                                                                                                                                                                                                                                                                                                                                                                                                                                                                                                                                                                                                                                                                                                                                                                                                                                                                                                                                                                                                                                                                                                                                                                                                                                                                                                                                                                                                                                                                                                                                                                                                                                                                                                                                                                                                                                                                                                                                                                                                                                                                                                                                                                                                                                                                                                                                                                                                                                                                                                                                                                                                                                                                                                                                                                                                                                                                                                                                                                                                                                                                                                                                                                                                                                                                                                                                                            | 95%CI      | P <sup>(z)</sup> | OR           | (95%CI)     | P <sup>(z)</sup> | OR           | (95%CI)    | P <sup>(z)</sup> | OR                | (95%CI)    | P <sup>(z)</sup> | OR                | (95%CI)     |  |                   |  |    |       |                  |    |         |                  |    |         |                  |    |         |                  |    |         |         |   |      |           |       |      |           |       |      |           |       |      |           |       |       |            |          |   |      |           |       |      |           |       |      |           |       |      |           |       |       |            |            |   |      |           |       |   |   |   |      |           |       |      |           |       |   |   |           |   |      |           |       |      |           |       |      |           |       |      |           |       |      |           |       |   |      |           |       |   |   |   |      |           |       |      |           |       |   |   |    |   |      |           |       |   |   |   |      |           |       |      |           |       |   |   |    |   |      |           |       |      |           |       |      |           |       |      |           |       |       |             |    |   |      |           |       |      |           |       |      |           |       |      |           |       |       |             |        |    |            |  |  |              |  |  |              |  |  |                   |  |  |                   |  |    |       |                  |    |         |                  |    |         |                  |    |         |                  |    |         |         |   |      |            |       |       |             |       |      |           |       |      |            |       |       |             |          |   |      |           |       |       |             |       |      |           |       |      |            |       |       |             |            |   |      |           |       |   |   |   |      |           |       |      |           |       |   |   |           |   |      |            |       |   |   |   |      |            |       |      |            |       |   |   |       |   |      |           |       |   |   |   |      |           |       |      |           |       |   |   |    |   |      |           |       |   |   |   |      |           |       |      |           |       |   |   |    |   |      |           |       |       |             |       |      |           |       |      |            |       |       |             |    |   |      |            |       |       |             |       |      |           |       |      |            |       |       |             |
| Overall                       | 7  | 1.66                                                                                                                                                                                                                                                                                                                                                                                                                                                                                                                                                                                                                                                                                                                                                                                                                                                                                                                                                                                                                                                                                                                                                                                                                                                                                                                                                                                                                                                                                                                                                                                                                                                                                                                                                                                                                                                                                                                                                                                                                                                                                                                                                                                                                                                                                                                                                                                                                                                                                                                                                                                                                                                                                                                                                                                                                                                                                                                                                                                                                                                                                                                                                                                                                                                                                                                                                                                                                                                                                                                                                                                                                                                                                                                                                                                                                                                                                                                                                                                                                                                                                                                                                                                                                                                                                                                                                                                                                                                                                                                                                                                                                                                                                                                                                                                                                                                                                                                                                                                                                                                                                                                                                                                                                                                                                                                                                                                                                                                                                                                                                          | 0.92-2.99  | 0.095            | 2.27         | 1.17-4.42   | 0.016            | 0.98         | 0.70-1.38  | 0.914            | 1.16              | 0.85-1.59  | 0.355            | 11.53             | 1.11-120.4  |  |                   |  |    |       |                  |    |         |                  |    |         |                  |    |         |                  |    |         |         |   |      |           |       |      |           |       |      |           |       |      |           |       |       |            |          |   |      |           |       |      |           |       |      |           |       |      |           |       |       |            |            |   |      |           |       |   |   |   |      |           |       |      |           |       |   |   |           |   |      |           |       |      |           |       |      |           |       |      |           |       |      |           |       |   |      |           |       |   |   |   |      |           |       |      |           |       |   |   |    |   |      |           |       |   |   |   |      |           |       |      |           |       |   |   |    |   |      |           |       |      |           |       |      |           |       |      |           |       |       |             |    |   |      |           |       |      |           |       |      |           |       |      |           |       |       |             |        |    |            |  |  |              |  |  |              |  |  |                   |  |  |                   |  |    |       |                  |    |         |                  |    |         |                  |    |         |                  |    |         |         |   |      |            |       |       |             |       |      |           |       |      |            |       |       |             |          |   |      |           |       |       |             |       |      |           |       |      |            |       |       |             |            |   |      |           |       |   |   |   |      |           |       |      |           |       |   |   |           |   |      |            |       |   |   |   |      |            |       |      |            |       |   |   |       |   |      |           |       |   |   |   |      |           |       |      |           |       |   |   |    |   |      |           |       |   |   |   |      |           |       |      |           |       |   |   |    |   |      |           |       |       |             |       |      |           |       |      |            |       |       |             |    |   |      |            |       |       |             |       |      |           |       |      |            |       |       |             |
| PCR-RFLP                      | 4  | 2.44                                                                                                                                                                                                                                                                                                                                                                                                                                                                                                                                                                                                                                                                                                                                                                                                                                                                                                                                                                                                                                                                                                                                                                                                                                                                                                                                                                                                                                                                                                                                                                                                                                                                                                                                                                                                                                                                                                                                                                                                                                                                                                                                                                                                                                                                                                                                                                                                                                                                                                                                                                                                                                                                                                                                                                                                                                                                                                                                                                                                                                                                                                                                                                                                                                                                                                                                                                                                                                                                                                                                                                                                                                                                                                                                                                                                                                                                                                                                                                                                                                                                                                                                                                                                                                                                                                                                                                                                                                                                                                                                                                                                                                                                                                                                                                                                                                                                                                                                                                                                                                                                                                                                                                                                                                                                                                                                                                                                                                                                                                                                                          | 0.90-6.64  | 0.081            | 2.27         | 1.17-4.42   | 0.016            | 0.86         | 0.55-1.34  | 0.506            | 1.14              | 0.78-1.67  | 0.503            | 11.53             | 1.11-120.4  |  |                   |  |    |       |                  |    |         |                  |    |         |                  |    |         |                  |    |         |         |   |      |           |       |      |           |       |      |           |       |      |           |       |       |            |          |   |      |           |       |      |           |       |      |           |       |      |           |       |       |            |            |   |      |           |       |   |   |   |      |           |       |      |           |       |   |   |           |   |      |           |       |      |           |       |      |           |       |      |           |       |      |           |       |   |      |           |       |   |   |   |      |           |       |      |           |       |   |   |    |   |      |           |       |   |   |   |      |           |       |      |           |       |   |   |    |   |      |           |       |      |           |       |      |           |       |      |           |       |       |             |    |   |      |           |       |      |           |       |      |           |       |      |           |       |       |             |        |    |            |  |  |              |  |  |              |  |  |                   |  |  |                   |  |    |       |                  |    |         |                  |    |         |                  |    |         |                  |    |         |         |   |      |            |       |       |             |       |      |           |       |      |            |       |       |             |          |   |      |           |       |       |             |       |      |           |       |      |            |       |       |             |            |   |      |           |       |   |   |   |      |           |       |      |           |       |   |   |           |   |      |            |       |   |   |   |      |            |       |      |            |       |   |   |       |   |      |           |       |   |   |   |      |           |       |      |           |       |   |   |    |   |      |           |       |   |   |   |      |           |       |      |           |       |   |   |    |   |      |           |       |       |             |       |      |           |       |      |            |       |       |             |    |   |      |            |       |       |             |       |      |           |       |      |            |       |       |             |
| Sequencing                    | 3  | 1.20                                                                                                                                                                                                                                                                                                                                                                                                                                                                                                                                                                                                                                                                                                                                                                                                                                                                                                                                                                                                                                                                                                                                                                                                                                                                                                                                                                                                                                                                                                                                                                                                                                                                                                                                                                                                                                                                                                                                                                                                                                                                                                                                                                                                                                                                                                                                                                                                                                                                                                                                                                                                                                                                                                                                                                                                                                                                                                                                                                                                                                                                                                                                                                                                                                                                                                                                                                                                                                                                                                                                                                                                                                                                                                                                                                                                                                                                                                                                                                                                                                                                                                                                                                                                                                                                                                                                                                                                                                                                                                                                                                                                                                                                                                                                                                                                                                                                                                                                                                                                                                                                                                                                                                                                                                                                                                                                                                                                                                                                                                                                                          | 0.70-2.03  | 0.506            | —            | —           | —                | 1.20         | 0.69-2.09  | 0.514            | 1.20              | 0.69-2.09  | 0.514            | —                 | —           |  |                   |  |    |       |                  |    |         |                  |    |         |                  |    |         |                  |    |         |         |   |      |           |       |      |           |       |      |           |       |      |           |       |       |            |          |   |      |           |       |      |           |       |      |           |       |      |           |       |       |            |            |   |      |           |       |   |   |   |      |           |       |      |           |       |   |   |           |   |      |           |       |      |           |       |      |           |       |      |           |       |      |           |       |   |      |           |       |   |   |   |      |           |       |      |           |       |   |   |    |   |      |           |       |   |   |   |      |           |       |      |           |       |   |   |    |   |      |           |       |      |           |       |      |           |       |      |           |       |       |             |    |   |      |           |       |      |           |       |      |           |       |      |           |       |       |             |        |    |            |  |  |              |  |  |              |  |  |                   |  |  |                   |  |    |       |                  |    |         |                  |    |         |                  |    |         |                  |    |         |         |   |      |            |       |       |             |       |      |           |       |      |            |       |       |             |          |   |      |           |       |       |             |       |      |           |       |      |            |       |       |             |            |   |      |           |       |   |   |   |      |           |       |      |           |       |   |   |           |   |      |            |       |   |   |   |      |            |       |      |            |       |   |   |       |   |      |           |       |   |   |   |      |           |       |      |           |       |   |   |    |   |      |           |       |   |   |   |      |           |       |      |           |       |   |   |    |   |      |           |       |       |             |       |      |           |       |      |            |       |       |             |    |   |      |            |       |       |             |       |      |           |       |      |            |       |       |             |
| Caucasian                     | 2  | 1.26                                                                                                                                                                                                                                                                                                                                                                                                                                                                                                                                                                                                                                                                                                                                                                                                                                                                                                                                                                                                                                                                                                                                                                                                                                                                                                                                                                                                                                                                                                                                                                                                                                                                                                                                                                                                                                                                                                                                                                                                                                                                                                                                                                                                                                                                                                                                                                                                                                                                                                                                                                                                                                                                                                                                                                                                                                                                                                                                                                                                                                                                                                                                                                                                                                                                                                                                                                                                                                                                                                                                                                                                                                                                                                                                                                                                                                                                                                                                                                                                                                                                                                                                                                                                                                                                                                                                                                                                                                                                                                                                                                                                                                                                                                                                                                                                                                                                                                                                                                                                                                                                                                                                                                                                                                                                                                                                                                                                                                                                                                                                                          | 0.84-1.90  | 0.270            | 2.16         | 1.09-4.27   | 0.028            | 0.69         | 0.40-1.17  | 0.168            | 1.02              | 0.66-1.57  | 0.926            | 2.28              | 1.15-5.51   |  |                   |  |    |       |                  |    |         |                  |    |         |                  |    |         |                  |    |         |         |   |      |           |       |      |           |       |      |           |       |      |           |       |       |            |          |   |      |           |       |      |           |       |      |           |       |      |           |       |       |            |            |   |      |           |       |   |   |   |      |           |       |      |           |       |   |   |           |   |      |           |       |      |           |       |      |           |       |      |           |       |      |           |       |   |      |           |       |   |   |   |      |           |       |      |           |       |   |   |    |   |      |           |       |   |   |   |      |           |       |      |           |       |   |   |    |   |      |           |       |      |           |       |      |           |       |      |           |       |       |             |    |   |      |           |       |      |           |       |      |           |       |      |           |       |       |             |        |    |            |  |  |              |  |  |              |  |  |                   |  |  |                   |  |    |       |                  |    |         |                  |    |         |                  |    |         |                  |    |         |         |   |      |            |       |       |             |       |      |           |       |      |            |       |       |             |          |   |      |           |       |       |             |       |      |           |       |      |            |       |       |             |            |   |      |           |       |   |   |   |      |           |       |      |           |       |   |   |           |   |      |            |       |   |   |   |      |            |       |      |            |       |   |   |       |   |      |           |       |   |   |   |      |           |       |      |           |       |   |   |    |   |      |           |       |   |   |   |      |           |       |      |           |       |   |   |    |   |      |           |       |       |             |       |      |           |       |      |            |       |       |             |    |   |      |            |       |       |             |       |      |           |       |      |            |       |       |             |
| Asian                         | 4  | 1.37                                                                                                                                                                                                                                                                                                                                                                                                                                                                                                                                                                                                                                                                                                                                                                                                                                                                                                                                                                                                                                                                                                                                                                                                                                                                                                                                                                                                                                                                                                                                                                                                                                                                                                                                                                                                                                                                                                                                                                                                                                                                                                                                                                                                                                                                                                                                                                                                                                                                                                                                                                                                                                                                                                                                                                                                                                                                                                                                                                                                                                                                                                                                                                                                                                                                                                                                                                                                                                                                                                                                                                                                                                                                                                                                                                                                                                                                                                                                                                                                                                                                                                                                                                                                                                                                                                                                                                                                                                                                                                                                                                                                                                                                                                                                                                                                                                                                                                                                                                                                                                                                                                                                                                                                                                                                                                                                                                                                                                                                                                                                                          | 0.88-2.13  | 0.159            | —            | —           | —                | 1.30         | 0.82-2.07  | 0.269            | 1.34              | 0.85-2.12  | 0.213            | —                 | —           |  |                   |  |    |       |                  |    |         |                  |    |         |                  |    |         |                  |    |         |         |   |      |           |       |      |           |       |      |           |       |      |           |       |       |            |          |   |      |           |       |      |           |       |      |           |       |      |           |       |       |            |            |   |      |           |       |   |   |   |      |           |       |      |           |       |   |   |           |   |      |           |       |      |           |       |      |           |       |      |           |       |      |           |       |   |      |           |       |   |   |   |      |           |       |      |           |       |   |   |    |   |      |           |       |   |   |   |      |           |       |      |           |       |   |   |    |   |      |           |       |      |           |       |      |           |       |      |           |       |       |             |    |   |      |           |       |      |           |       |      |           |       |      |           |       |       |             |        |    |            |  |  |              |  |  |              |  |  |                   |  |  |                   |  |    |       |                  |    |         |                  |    |         |                  |    |         |                  |    |         |         |   |      |            |       |       |             |       |      |           |       |      |            |       |       |             |          |   |      |           |       |       |             |       |      |           |       |      |            |       |       |             |            |   |      |           |       |   |   |   |      |           |       |      |           |       |   |   |           |   |      |            |       |   |   |   |      |            |       |      |            |       |   |   |       |   |      |           |       |   |   |   |      |           |       |      |           |       |   |   |    |   |      |           |       |   |   |   |      |           |       |      |           |       |   |   |    |   |      |           |       |       |             |       |      |           |       |      |            |       |       |             |    |   |      |            |       |       |             |       |      |           |       |      |            |       |       |             |
| HB                            | 3  | 1.31                                                                                                                                                                                                                                                                                                                                                                                                                                                                                                                                                                                                                                                                                                                                                                                                                                                                                                                                                                                                                                                                                                                                                                                                                                                                                                                                                                                                                                                                                                                                                                                                                                                                                                                                                                                                                                                                                                                                                                                                                                                                                                                                                                                                                                                                                                                                                                                                                                                                                                                                                                                                                                                                                                                                                                                                                                                                                                                                                                                                                                                                                                                                                                                                                                                                                                                                                                                                                                                                                                                                                                                                                                                                                                                                                                                                                                                                                                                                                                                                                                                                                                                                                                                                                                                                                                                                                                                                                                                                                                                                                                                                                                                                                                                                                                                                                                                                                                                                                                                                                                                                                                                                                                                                                                                                                                                                                                                                                                                                                                                                                          | 0.90-1.90  | 0.162            | —            | —           | —                | 0.92         | 0.57-1.48  | 0.736            | 1.13              | 0.73-1.74  | 0.582            | —                 | —           |  |                   |  |    |       |                  |    |         |                  |    |         |                  |    |         |                  |    |         |         |   |      |           |       |      |           |       |      |           |       |      |           |       |       |            |          |   |      |           |       |      |           |       |      |           |       |      |           |       |       |            |            |   |      |           |       |   |   |   |      |           |       |      |           |       |   |   |           |   |      |           |       |      |           |       |      |           |       |      |           |       |      |           |       |   |      |           |       |   |   |   |      |           |       |      |           |       |   |   |    |   |      |           |       |   |   |   |      |           |       |      |           |       |   |   |    |   |      |           |       |      |           |       |      |           |       |      |           |       |       |             |    |   |      |           |       |      |           |       |      |           |       |      |           |       |       |             |        |    |            |  |  |              |  |  |              |  |  |                   |  |  |                   |  |    |       |                  |    |         |                  |    |         |                  |    |         |                  |    |         |         |   |      |            |       |       |             |       |      |           |       |      |            |       |       |             |          |   |      |           |       |       |             |       |      |           |       |      |            |       |       |             |            |   |      |           |       |   |   |   |      |           |       |      |           |       |   |   |           |   |      |            |       |   |   |   |      |            |       |      |            |       |   |   |       |   |      |           |       |   |   |   |      |           |       |      |           |       |   |   |    |   |      |           |       |   |   |   |      |           |       |      |           |       |   |   |    |   |      |           |       |       |             |       |      |           |       |      |            |       |       |             |    |   |      |            |       |       |             |       |      |           |       |      |            |       |       |             |
| PB                            | 4  | 2.87                                                                                                                                                                                                                                                                                                                                                                                                                                                                                                                                                                                                                                                                                                                                                                                                                                                                                                                                                                                                                                                                                                                                                                                                                                                                                                                                                                                                                                                                                                                                                                                                                                                                                                                                                                                                                                                                                                                                                                                                                                                                                                                                                                                                                                                                                                                                                                                                                                                                                                                                                                                                                                                                                                                                                                                                                                                                                                                                                                                                                                                                                                                                                                                                                                                                                                                                                                                                                                                                                                                                                                                                                                                                                                                                                                                                                                                                                                                                                                                                                                                                                                                                                                                                                                                                                                                                                                                                                                                                                                                                                                                                                                                                                                                                                                                                                                                                                                                                                                                                                                                                                                                                                                                                                                                                                                                                                                                                                                                                                                                                                          | 0.82-10.0  | 0.099            | 2.01         | 0.75-5.41   | 0.168            | 1.05         | 0.64-1.73  | 0.843            | 1.20              | 0.76-1.89  | 0.442            | 22.82             | 0.28-1887.8 |  |                   |  |    |       |                  |    |         |                  |    |         |                  |    |         |                  |    |         |         |   |      |           |       |      |           |       |      |           |       |      |           |       |       |            |          |   |      |           |       |      |           |       |      |           |       |      |           |       |       |            |            |   |      |           |       |   |   |   |      |           |       |      |           |       |   |   |           |   |      |           |       |      |           |       |      |           |       |      |           |       |      |           |       |   |      |           |       |   |   |   |      |           |       |      |           |       |   |   |    |   |      |           |       |   |   |   |      |           |       |      |           |       |   |   |    |   |      |           |       |      |           |       |      |           |       |      |           |       |       |             |    |   |      |           |       |      |           |       |      |           |       |      |           |       |       |             |        |    |            |  |  |              |  |  |              |  |  |                   |  |  |                   |  |    |       |                  |    |         |                  |    |         |                  |    |         |                  |    |         |         |   |      |            |       |       |             |       |      |           |       |      |            |       |       |             |          |   |      |           |       |       |             |       |      |           |       |      |            |       |       |             |            |   |      |           |       |   |   |   |      |           |       |      |           |       |   |   |           |   |      |            |       |   |   |   |      |            |       |      |            |       |   |   |       |   |      |           |       |   |   |   |      |           |       |      |           |       |   |   |    |   |      |           |       |   |   |   |      |           |       |      |           |       |   |   |    |   |      |           |       |       |             |       |      |           |       |      |            |       |       |             |    |   |      |            |       |       |             |       |      |           |       |      |            |       |       |             |
| OC                            | 5  | 1.95                                                                                                                                                                                                                                                                                                                                                                                                                                                                                                                                                                                                                                                                                                                                                                                                                                                                                                                                                                                                                                                                                                                                                                                                                                                                                                                                                                                                                                                                                                                                                                                                                                                                                                                                                                                                                                                                                                                                                                                                                                                                                                                                                                                                                                                                                                                                                                                                                                                                                                                                                                                                                                                                                                                                                                                                                                                                                                                                                                                                                                                                                                                                                                                                                                                                                                                                                                                                                                                                                                                                                                                                                                                                                                                                                                                                                                                                                                                                                                                                                                                                                                                                                                                                                                                                                                                                                                                                                                                                                                                                                                                                                                                                                                                                                                                                                                                                                                                                                                                                                                                                                                                                                                                                                                                                                                                                                                                                                                                                                                                                                          | 0.70-5.43  | 0.201            | 2.01         | 0.75-5.41   | 0.168            | 0.89         | 0.57-1.40  | 0.612            | 1.01              | 0.66-1.54  | 0.957            | 22.82             | 0.28-1887.8 |  |                   |  |    |       |                  |    |         |                  |    |         |                  |    |         |                  |    |         |         |   |      |           |       |      |           |       |      |           |       |      |           |       |       |            |          |   |      |           |       |      |           |       |      |           |       |      |           |       |       |            |            |   |      |           |       |   |   |   |      |           |       |      |           |       |   |   |           |   |      |           |       |      |           |       |      |           |       |      |           |       |      |           |       |   |      |           |       |   |   |   |      |           |       |      |           |       |   |   |    |   |      |           |       |   |   |   |      |           |       |      |           |       |   |   |    |   |      |           |       |      |           |       |      |           |       |      |           |       |       |             |    |   |      |           |       |      |           |       |      |           |       |      |           |       |       |             |        |    |            |  |  |              |  |  |              |  |  |                   |  |  |                   |  |    |       |                  |    |         |                  |    |         |                  |    |         |                  |    |         |         |   |      |            |       |       |             |       |      |           |       |      |            |       |       |             |          |   |      |           |       |       |             |       |      |           |       |      |            |       |       |             |            |   |      |           |       |   |   |   |      |           |       |      |           |       |   |   |           |   |      |            |       |   |   |   |      |            |       |      |            |       |   |   |       |   |      |           |       |   |   |   |      |           |       |      |           |       |   |   |    |   |      |           |       |   |   |   |      |           |       |      |           |       |   |   |    |   |      |           |       |       |             |       |      |           |       |      |            |       |       |             |    |   |      |            |       |       |             |       |      |           |       |      |            |       |       |             |
| G1790A                        | No | A versus G                                                                                                                                                                                                                                                                                                                                                                                                                                                                                                                                                                                                                                                                                                                                                                                                                                                                                                                                                                                                                                                                                                                                                                                                                                                                                                                                                                                                                                                                                                                                                                                                                                                                                                                                                                                                                                                                                                                                                                                                                                                                                                                                                                                                                                                                                                                                                                                                                                                                                                                                                                                                                                                                                                                                                                                                                                                                                                                                                                                                                                                                                                                                                                                                                                                                                                                                                                                                                                                                                                                                                                                                                                                                                                                                                                                                                                                                                                                                                                                                                                                                                                                                                                                                                                                                                                                                                                                                                                                                                                                                                                                                                                                                                                                                                                                                                                                                                                                                                                                                                                                                                                                                                                                                                                                                                                                                                                                                                                                                                                                                                    |            |                  | AA versus GG |             |                  | AG versus GG |            |                  | AA + AG versus GG |            |                  | AA versus AG + GG |             |  |                   |  |    |       |                  |    |         |                  |    |         |                  |    |         |                  |    |         |         |   |      |           |       |      |           |       |      |           |       |      |           |       |       |            |          |   |      |           |       |      |           |       |      |           |       |      |           |       |       |            |            |   |      |           |       |   |   |   |      |           |       |      |           |       |   |   |           |   |      |           |       |      |           |       |      |           |       |      |           |       |      |           |       |   |      |           |       |   |   |   |      |           |       |      |           |       |   |   |    |   |      |           |       |   |   |   |      |           |       |      |           |       |   |   |    |   |      |           |       |      |           |       |      |           |       |      |           |       |       |             |    |   |      |           |       |      |           |       |      |           |       |      |           |       |       |             |        |    |            |  |  |              |  |  |              |  |  |                   |  |  |                   |  |    |       |                  |    |         |                  |    |         |                  |    |         |                  |    |         |         |   |      |            |       |       |             |       |      |           |       |      |            |       |       |             |          |   |      |           |       |       |             |       |      |           |       |      |            |       |       |             |            |   |      |           |       |   |   |   |      |           |       |      |           |       |   |   |           |   |      |            |       |   |   |   |      |            |       |      |            |       |   |   |       |   |      |           |       |   |   |   |      |           |       |      |           |       |   |   |    |   |      |           |       |   |   |   |      |           |       |      |           |       |   |   |    |   |      |           |       |       |             |       |      |           |       |      |            |       |       |             |    |   |      |            |       |       |             |       |      |           |       |      |            |       |       |             |
|                               |    | OR                                                                                                                                                                                                                                                                                                                                                                                                                                                                                                                                                                                                                                                                                                                                                                                                                                                                                                                                                                                                                                                                                                                                                                                                                                                                                                                                                                                                                                                                                                                                                                                                                                                                                                                                                                                                                                                                                                                                                                                                                                                                                                                                                                                                                                                                                                                                                                                                                                                                                                                                                                                                                                                                                                                                                                                                                                                                                                                                                                                                                                                                                                                                                                                                                                                                                                                                                                                                                                                                                                                                                                                                                                                                                                                                                                                                                                                                                                                                                                                                                                                                                                                                                                                                                                                                                                                                                                                                                                                                                                                                                                                                                                                                                                                                                                                                                                                                                                                                                                                                                                                                                                                                                                                                                                                                                                                                                                                                                                                                                                                                                            | 95%CI      | P <sup>(z)</sup> | OR           | (95%CI)     | P <sup>(z)</sup> | OR           | (95%CI)    | P <sup>(z)</sup> | OR                | (95%CI)    | P <sup>(z)</sup> | OR                | (95%CI)     |  |                   |  |    |       |                  |    |         |                  |    |         |                  |    |         |                  |    |         |         |   |      |           |       |      |           |       |      |           |       |      |           |       |       |            |          |   |      |           |       |      |           |       |      |           |       |      |           |       |       |            |            |   |      |           |       |   |   |   |      |           |       |      |           |       |   |   |           |   |      |           |       |      |           |       |      |           |       |      |           |       |      |           |       |   |      |           |       |   |   |   |      |           |       |      |           |       |   |   |    |   |      |           |       |   |   |   |      |           |       |      |           |       |   |   |    |   |      |           |       |      |           |       |      |           |       |      |           |       |       |             |    |   |      |           |       |      |           |       |      |           |       |      |           |       |       |             |        |    |            |  |  |              |  |  |              |  |  |                   |  |  |                   |  |    |       |                  |    |         |                  |    |         |                  |    |         |                  |    |         |         |   |      |            |       |       |             |       |      |           |       |      |            |       |       |             |          |   |      |           |       |       |             |       |      |           |       |      |            |       |       |             |            |   |      |           |       |   |   |   |      |           |       |      |           |       |   |   |           |   |      |            |       |   |   |   |      |            |       |      |            |       |   |   |       |   |      |           |       |   |   |   |      |           |       |      |           |       |   |   |    |   |      |           |       |   |   |   |      |           |       |      |           |       |   |   |    |   |      |           |       |       |             |       |      |           |       |      |            |       |       |             |    |   |      |            |       |       |             |       |      |           |       |      |            |       |       |             |
| Overall                       | 6  | 4.11                                                                                                                                                                                                                                                                                                                                                                                                                                                                                                                                                                                                                                                                                                                                                                                                                                                                                                                                                                                                                                                                                                                                                                                                                                                                                                                                                                                                                                                                                                                                                                                                                                                                                                                                                                                                                                                                                                                                                                                                                                                                                                                                                                                                                                                                                                                                                                                                                                                                                                                                                                                                                                                                                                                                                                                                                                                                                                                                                                                                                                                                                                                                                                                                                                                                                                                                                                                                                                                                                                                                                                                                                                                                                                                                                                                                                                                                                                                                                                                                                                                                                                                                                                                                                                                                                                                                                                                                                                                                                                                                                                                                                                                                                                                                                                                                                                                                                                                                                                                                                                                                                                                                                                                                                                                                                                                                                                                                                                                                                                                                                          | 0.84-20.15 | 0.081            | 72.11        | 2.08-2502.4 | 0.018            | 1.94         | 0.83-4.55  | 0.128            | 3.57              | 0.97-13.14 | 0.055            | 58.05             | 1.70-1985.8 |  |                   |  |    |       |                  |    |         |                  |    |         |                  |    |         |                  |    |         |         |   |      |           |       |      |           |       |      |           |       |      |           |       |       |            |          |   |      |           |       |      |           |       |      |           |       |      |           |       |       |            |            |   |      |           |       |   |   |   |      |           |       |      |           |       |   |   |           |   |      |           |       |      |           |       |      |           |       |      |           |       |      |           |       |   |      |           |       |   |   |   |      |           |       |      |           |       |   |   |    |   |      |           |       |   |   |   |      |           |       |      |           |       |   |   |    |   |      |           |       |      |           |       |      |           |       |      |           |       |       |             |    |   |      |           |       |      |           |       |      |           |       |      |           |       |       |             |        |    |            |  |  |              |  |  |              |  |  |                   |  |  |                   |  |    |       |                  |    |         |                  |    |         |                  |    |         |                  |    |         |         |   |      |            |       |       |             |       |      |           |       |      |            |       |       |             |          |   |      |           |       |       |             |       |      |           |       |      |            |       |       |             |            |   |      |           |       |   |   |   |      |           |       |      |           |       |   |   |           |   |      |            |       |   |   |   |      |            |       |      |            |       |   |   |       |   |      |           |       |   |   |   |      |           |       |      |           |       |   |   |    |   |      |           |       |   |   |   |      |           |       |      |           |       |   |   |    |   |      |           |       |       |             |       |      |           |       |      |            |       |       |             |    |   |      |            |       |       |             |       |      |           |       |      |            |       |       |             |
| PCR-RFLP                      | 4  | 8.39                                                                                                                                                                                                                                                                                                                                                                                                                                                                                                                                                                                                                                                                                                                                                                                                                                                                                                                                                                                                                                                                                                                                                                                                                                                                                                                                                                                                                                                                                                                                                                                                                                                                                                                                                                                                                                                                                                                                                                                                                                                                                                                                                                                                                                                                                                                                                                                                                                                                                                                                                                                                                                                                                                                                                                                                                                                                                                                                                                                                                                                                                                                                                                                                                                                                                                                                                                                                                                                                                                                                                                                                                                                                                                                                                                                                                                                                                                                                                                                                                                                                                                                                                                                                                                                                                                                                                                                                                                                                                                                                                                                                                                                                                                                                                                                                                                                                                                                                                                                                                                                                                                                                                                                                                                                                                                                                                                                                                                                                                                                                                          | 0.98-72.1  | 0.053            | 72.11        | 2.08-2502.4 | 0.018            | 2.81         | 0.91-8.72  | 0.074            | 7.00              | 1.18-41.68 | 0.032            | 58.05             | 1.70-1985.8 |  |                   |  |    |       |                  |    |         |                  |    |         |                  |    |         |                  |    |         |         |   |      |           |       |      |           |       |      |           |       |      |           |       |       |            |          |   |      |           |       |      |           |       |      |           |       |      |           |       |       |            |            |   |      |           |       |   |   |   |      |           |       |      |           |       |   |   |           |   |      |           |       |      |           |       |      |           |       |      |           |       |      |           |       |   |      |           |       |   |   |   |      |           |       |      |           |       |   |   |    |   |      |           |       |   |   |   |      |           |       |      |           |       |   |   |    |   |      |           |       |      |           |       |      |           |       |      |           |       |       |             |    |   |      |           |       |      |           |       |      |           |       |      |           |       |       |             |        |    |            |  |  |              |  |  |              |  |  |                   |  |  |                   |  |    |       |                  |    |         |                  |    |         |                  |    |         |                  |    |         |         |   |      |            |       |       |             |       |      |           |       |      |            |       |       |             |          |   |      |           |       |       |             |       |      |           |       |      |            |       |       |             |            |   |      |           |       |   |   |   |      |           |       |      |           |       |   |   |           |   |      |            |       |   |   |   |      |            |       |      |            |       |   |   |       |   |      |           |       |   |   |   |      |           |       |      |           |       |   |   |    |   |      |           |       |   |   |   |      |           |       |      |           |       |   |   |    |   |      |           |       |       |             |       |      |           |       |      |            |       |       |             |    |   |      |            |       |       |             |       |      |           |       |      |            |       |       |             |
| Sequencing                    | 2  | 1.01                                                                                                                                                                                                                                                                                                                                                                                                                                                                                                                                                                                                                                                                                                                                                                                                                                                                                                                                                                                                                                                                                                                                                                                                                                                                                                                                                                                                                                                                                                                                                                                                                                                                                                                                                                                                                                                                                                                                                                                                                                                                                                                                                                                                                                                                                                                                                                                                                                                                                                                                                                                                                                                                                                                                                                                                                                                                                                                                                                                                                                                                                                                                                                                                                                                                                                                                                                                                                                                                                                                                                                                                                                                                                                                                                                                                                                                                                                                                                                                                                                                                                                                                                                                                                                                                                                                                                                                                                                                                                                                                                                                                                                                                                                                                                                                                                                                                                                                                                                                                                                                                                                                                                                                                                                                                                                                                                                                                                                                                                                                                                          | 0.50-2.03  | 0.975            | —            | —           | —                | 1.01         | 0.50-2.06  | 0.975            | 1.01              | 0.50-2.06  | 0.975            | —                 | —           |  |                   |  |    |       |                  |    |         |                  |    |         |                  |    |         |                  |    |         |         |   |      |           |       |      |           |       |      |           |       |      |           |       |       |            |          |   |      |           |       |      |           |       |      |           |       |      |           |       |       |            |            |   |      |           |       |   |   |   |      |           |       |      |           |       |   |   |           |   |      |           |       |      |           |       |      |           |       |      |           |       |      |           |       |   |      |           |       |   |   |   |      |           |       |      |           |       |   |   |    |   |      |           |       |   |   |   |      |           |       |      |           |       |   |   |    |   |      |           |       |      |           |       |      |           |       |      |           |       |       |             |    |   |      |           |       |      |           |       |      |           |       |      |           |       |       |             |        |    |            |  |  |              |  |  |              |  |  |                   |  |  |                   |  |    |       |                  |    |         |                  |    |         |                  |    |         |                  |    |         |         |   |      |            |       |       |             |       |      |           |       |      |            |       |       |             |          |   |      |           |       |       |             |       |      |           |       |      |            |       |       |             |            |   |      |           |       |   |   |   |      |           |       |      |           |       |   |   |           |   |      |            |       |   |   |   |      |            |       |      |            |       |   |   |       |   |      |           |       |   |   |   |      |           |       |      |           |       |   |   |    |   |      |           |       |   |   |   |      |           |       |      |           |       |   |   |    |   |      |           |       |       |             |       |      |           |       |      |            |       |       |             |    |   |      |            |       |       |             |       |      |           |       |      |            |       |       |             |
| Caucasian                     | 2  | 2.18                                                                                                                                                                                                                                                                                                                                                                                                                                                                                                                                                                                                                                                                                                                                                                                                                                                                                                                                                                                                                                                                                                                                                                                                                                                                                                                                                                                                                                                                                                                                                                                                                                                                                                                                                                                                                                                                                                                                                                                                                                                                                                                                                                                                                                                                                                                                                                                                                                                                                                                                                                                                                                                                                                                                                                                                                                                                                                                                                                                                                                                                                                                                                                                                                                                                                                                                                                                                                                                                                                                                                                                                                                                                                                                                                                                                                                                                                                                                                                                                                                                                                                                                                                                                                                                                                                                                                                                                                                                                                                                                                                                                                                                                                                                                                                                                                                                                                                                                                                                                                                                                                                                                                                                                                                                                                                                                                                                                                                                                                                                                                          | 0.16-30.19 | 0.562            | —            | —           | —                | 2.10         | 0.16-28.19 | 0.577            | 2.24              | 0.15-34.32 | 0.563            | —                 | —           |  |                   |  |    |       |                  |    |         |                  |    |         |                  |    |         |                  |    |         |         |   |      |           |       |      |           |       |      |           |       |      |           |       |       |            |          |   |      |           |       |      |           |       |      |           |       |      |           |       |       |            |            |   |      |           |       |   |   |   |      |           |       |      |           |       |   |   |           |   |      |           |       |      |           |       |      |           |       |      |           |       |      |           |       |   |      |           |       |   |   |   |      |           |       |      |           |       |   |   |    |   |      |           |       |   |   |   |      |           |       |      |           |       |   |   |    |   |      |           |       |      |           |       |      |           |       |      |           |       |       |             |    |   |      |           |       |      |           |       |      |           |       |      |           |       |       |             |        |    |            |  |  |              |  |  |              |  |  |                   |  |  |                   |  |    |       |                  |    |         |                  |    |         |                  |    |         |                  |    |         |         |   |      |            |       |       |             |       |      |           |       |      |            |       |       |             |          |   |      |           |       |       |             |       |      |           |       |      |            |       |       |             |            |   |      |           |       |   |   |   |      |           |       |      |           |       |   |   |           |   |      |            |       |   |   |   |      |            |       |      |            |       |   |   |       |   |      |           |       |   |   |   |      |           |       |      |           |       |   |   |    |   |      |           |       |   |   |   |      |           |       |      |           |       |   |   |    |   |      |           |       |       |             |       |      |           |       |      |            |       |       |             |    |   |      |            |       |       |             |       |      |           |       |      |            |       |       |             |
| Asian                         | 3  | 1.59                                                                                                                                                                                                                                                                                                                                                                                                                                                                                                                                                                                                                                                                                                                                                                                                                                                                                                                                                                                                                                                                                                                                                                                                                                                                                                                                                                                                                                                                                                                                                                                                                                                                                                                                                                                                                                                                                                                                                                                                                                                                                                                                                                                                                                                                                                                                                                                                                                                                                                                                                                                                                                                                                                                                                                                                                                                                                                                                                                                                                                                                                                                                                                                                                                                                                                                                                                                                                                                                                                                                                                                                                                                                                                                                                                                                                                                                                                                                                                                                                                                                                                                                                                                                                                                                                                                                                                                                                                                                                                                                                                                                                                                                                                                                                                                                                                                                                                                                                                                                                                                                                                                                                                                                                                                                                                                                                                                                                                                                                                                                                          | 0.67-3.78  | 0.294            | —            | —           | —                | 1.57         | 0.69-3.58  | 0.283            | 1.59              | 0.67-3.76  | 0.290            | —                 | —           |  |                   |  |    |       |                  |    |         |                  |    |         |                  |    |         |                  |    |         |         |   |      |           |       |      |           |       |      |           |       |      |           |       |       |            |          |   |      |           |       |      |           |       |      |           |       |      |           |       |       |            |            |   |      |           |       |   |   |   |      |           |       |      |           |       |   |   |           |   |      |           |       |      |           |       |      |           |       |      |           |       |      |           |       |   |      |           |       |   |   |   |      |           |       |      |           |       |   |   |    |   |      |           |       |   |   |   |      |           |       |      |           |       |   |   |    |   |      |           |       |      |           |       |      |           |       |      |           |       |       |             |    |   |      |           |       |      |           |       |      |           |       |      |           |       |       |             |        |    |            |  |  |              |  |  |              |  |  |                   |  |  |                   |  |    |       |                  |    |         |                  |    |         |                  |    |         |                  |    |         |         |   |      |            |       |       |             |       |      |           |       |      |            |       |       |             |          |   |      |           |       |       |             |       |      |           |       |      |            |       |       |             |            |   |      |           |       |   |   |   |      |           |       |      |           |       |   |   |           |   |      |            |       |   |   |   |      |            |       |      |            |       |   |   |       |   |      |           |       |   |   |   |      |           |       |      |           |       |   |   |    |   |      |           |       |   |   |   |      |           |       |      |           |       |   |   |    |   |      |           |       |       |             |       |      |           |       |      |            |       |       |             |    |   |      |            |       |       |             |       |      |           |       |      |            |       |       |             |
| HB                            | 2  | 0.86                                                                                                                                                                                                                                                                                                                                                                                                                                                                                                                                                                                                                                                                                                                                                                                                                                                                                                                                                                                                                                                                                                                                                                                                                                                                                                                                                                                                                                                                                                                                                                                                                                                                                                                                                                                                                                                                                                                                                                                                                                                                                                                                                                                                                                                                                                                                                                                                                                                                                                                                                                                                                                                                                                                                                                                                                                                                                                                                                                                                                                                                                                                                                                                                                                                                                                                                                                                                                                                                                                                                                                                                                                                                                                                                                                                                                                                                                                                                                                                                                                                                                                                                                                                                                                                                                                                                                                                                                                                                                                                                                                                                                                                                                                                                                                                                                                                                                                                                                                                                                                                                                                                                                                                                                                                                                                                                                                                                                                                                                                                                                          | 0.43-1.72  | 0.667            | —            | —           | —                | 0.85         | 0.42-1.73  | 0.660            | 0.85              | 0.42-1.73  | 0.660            | —                 | —           |  |                   |  |    |       |                  |    |         |                  |    |         |                  |    |         |                  |    |         |         |   |      |           |       |      |           |       |      |           |       |      |           |       |       |            |          |   |      |           |       |      |           |       |      |           |       |      |           |       |       |            |            |   |      |           |       |   |   |   |      |           |       |      |           |       |   |   |           |   |      |           |       |      |           |       |      |           |       |      |           |       |      |           |       |   |      |           |       |   |   |   |      |           |       |      |           |       |   |   |    |   |      |           |       |   |   |   |      |           |       |      |           |       |   |   |    |   |      |           |       |      |           |       |      |           |       |      |           |       |       |             |    |   |      |           |       |      |           |       |      |           |       |      |           |       |       |             |        |    |            |  |  |              |  |  |              |  |  |                   |  |  |                   |  |    |       |                  |    |         |                  |    |         |                  |    |         |                  |    |         |         |   |      |            |       |       |             |       |      |           |       |      |            |       |       |             |          |   |      |           |       |       |             |       |      |           |       |      |            |       |       |             |            |   |      |           |       |   |   |   |      |           |       |      |           |       |   |   |           |   |      |            |       |   |   |   |      |            |       |      |            |       |   |   |       |   |      |           |       |   |   |   |      |           |       |      |           |       |   |   |    |   |      |           |       |   |   |   |      |           |       |      |           |       |   |   |    |   |      |           |       |       |             |       |      |           |       |      |            |       |       |             |    |   |      |            |       |       |             |       |      |           |       |      |            |       |       |             |
| PB                            | 4  | 9.43                                                                                                                                                                                                                                                                                                                                                                                                                                                                                                                                                                                                                                                                                                                                                                                                                                                                                                                                                                                                                                                                                                                                                                                                                                                                                                                                                                                                                                                                                                                                                                                                                                                                                                                                                                                                                                                                                                                                                                                                                                                                                                                                                                                                                                                                                                                                                                                                                                                                                                                                                                                                                                                                                                                                                                                                                                                                                                                                                                                                                                                                                                                                                                                                                                                                                                                                                                                                                                                                                                                                                                                                                                                                                                                                                                                                                                                                                                                                                                                                                                                                                                                                                                                                                                                                                                                                                                                                                                                                                                                                                                                                                                                                                                                                                                                                                                                                                                                                                                                                                                                                                                                                                                                                                                                                                                                                                                                                                                                                                                                                                          | 1.20-73.9  | 0.033            | 72.11        | 2.08-2502.4 | 0.018            | 3.22         | 1.28-8.08  | 0.013            | 7.83              | 1.48-41.37 | 0.015            | 58.05             | 1.70-1985.8 |  |                   |  |    |       |                  |    |         |                  |    |         |                  |    |         |                  |    |         |         |   |      |           |       |      |           |       |      |           |       |      |           |       |       |            |          |   |      |           |       |      |           |       |      |           |       |      |           |       |       |            |            |   |      |           |       |   |   |   |      |           |       |      |           |       |   |   |           |   |      |           |       |      |           |       |      |           |       |      |           |       |      |           |       |   |      |           |       |   |   |   |      |           |       |      |           |       |   |   |    |   |      |           |       |   |   |   |      |           |       |      |           |       |   |   |    |   |      |           |       |      |           |       |      |           |       |      |           |       |       |             |    |   |      |           |       |      |           |       |      |           |       |      |           |       |       |             |        |    |            |  |  |              |  |  |              |  |  |                   |  |  |                   |  |    |       |                  |    |         |                  |    |         |                  |    |         |                  |    |         |         |   |      |            |       |       |             |       |      |           |       |      |            |       |       |             |          |   |      |           |       |       |             |       |      |           |       |      |            |       |       |             |            |   |      |           |       |   |   |   |      |           |       |      |           |       |   |   |           |   |      |            |       |   |   |   |      |            |       |      |            |       |   |   |       |   |      |           |       |   |   |   |      |           |       |      |           |       |   |   |    |   |      |           |       |   |   |   |      |           |       |      |           |       |   |   |    |   |      |           |       |       |             |       |      |           |       |      |            |       |       |             |    |   |      |            |       |       |             |       |      |           |       |      |            |       |       |             |
| OC                            | 4  | 9.66                                                                                                                                                                                                                                                                                                                                                                                                                                                                                                                                                                                                                                                                                                                                                                                                                                                                                                                                                                                                                                                                                                                                                                                                                                                                                                                                                                                                                                                                                                                                                                                                                                                                                                                                                                                                                                                                                                                                                                                                                                                                                                                                                                                                                                                                                                                                                                                                                                                                                                                                                                                                                                                                                                                                                                                                                                                                                                                                                                                                                                                                                                                                                                                                                                                                                                                                                                                                                                                                                                                                                                                                                                                                                                                                                                                                                                                                                                                                                                                                                                                                                                                                                                                                                                                                                                                                                                                                                                                                                                                                                                                                                                                                                                                                                                                                                                                                                                                                                                                                                                                                                                                                                                                                                                                                                                                                                                                                                                                                                                                                                          | 1.31-71.15 | 0.026            | 72.11        | 2.08-2502.4 | 0.018            | 3.17         | 1.26-7.92  | 0.014            | 7.92              | 1.58-39.64 | 0.012            | 58.05             | 1.70-1985.8 |  |                   |  |    |       |                  |    |         |                  |    |         |                  |    |         |                  |    |         |         |   |      |           |       |      |           |       |      |           |       |      |           |       |       |            |          |   |      |           |       |      |           |       |      |           |       |      |           |       |       |            |            |   |      |           |       |   |   |   |      |           |       |      |           |       |   |   |           |   |      |           |       |      |           |       |      |           |       |      |           |       |      |           |       |   |      |           |       |   |   |   |      |           |       |      |           |       |   |   |    |   |      |           |       |   |   |   |      |           |       |      |           |       |   |   |    |   |      |           |       |      |           |       |      |           |       |      |           |       |       |             |    |   |      |           |       |      |           |       |      |           |       |      |           |       |       |             |        |    |            |  |  |              |  |  |              |  |  |                   |  |  |                   |  |    |       |                  |    |         |                  |    |         |                  |    |         |                  |    |         |         |   |      |            |       |       |             |       |      |           |       |      |            |       |       |             |          |   |      |           |       |       |             |       |      |           |       |      |            |       |       |             |            |   |      |           |       |   |   |   |      |           |       |      |           |       |   |   |           |   |      |            |       |   |   |   |      |            |       |      |            |       |   |   |       |   |      |           |       |   |   |   |      |           |       |      |           |       |   |   |    |   |      |           |       |   |   |   |      |           |       |      |           |       |   |   |    |   |      |           |       |       |             |       |      |           |       |      |            |       |       |             |    |   |      |            |       |       |             |       |      |           |       |      |            |       |       |             |
| Synthesis of results          | 21 | <p align="center"><b>Table 2</b> Results of overall and subgroups analyses for C1772T and G1790A polymorphisms</p> <table border="1"> <thead> <tr> <th>C1772T</th> <th>No</th> <th colspan="3">T versus C</th> <th colspan="3">TT versus CC</th> <th colspan="3">TC versus CC</th> <th colspan="3">TT + TC versus CC</th> <th colspan="2">TT versus TC + CC</th> </tr> </thead> </table>                                                                                                                                                                                                                                                                                                                                                                                                                                                                                                                                                                                                                                                                                                                                                                                                                                                                                                                                                                                                                                                                                                                                                                                                                                                                                                                                                                                                                                                                                                                                                                                                                                                                                                                                                                                                                                                                                                                                                                                                                                                                                                                                                                                                                                                                                                                                                                                                                                                                                                                                                                                                                                                                                                                                                                                                                                                                                                                                                                                                                                                                                                                                                                                                                                                                                                                                                                                                                                                                                                                                                                                                                                                                                                                                                                                                                                                                                                                                                                                                                                                                                                                                                                                                                                                                                                                                                                                                                                                                                                                                                                                                                                                                                                                                                                                                                                                                                                                                                                                                                                                                                                                                                                      | C1772T     | No               | T versus C   |             |                  | TT versus CC |            |                  | TC versus CC      |            |                  | TT + TC versus CC |             |  | TT versus TC + CC |  |    |       |                  |    |         |                  |    |         |                  |    |         |                  |    |         |         |   |      |           |       |      |           |       |      |           |       |      |           |       |       |            |          |   |      |           |       |      |           |       |      |           |       |      |           |       |       |            |            |   |      |           |       |   |   |   |      |           |       |      |           |       |   |   |           |   |      |           |       |      |           |       |      |           |       |      |           |       |      |           |       |   |      |           |       |   |   |   |      |           |       |      |           |       |   |   |    |   |      |           |       |   |   |   |      |           |       |      |           |       |   |   |    |   |      |           |       |      |           |       |      |           |       |      |           |       |       |             |    |   |      |           |       |      |           |       |      |           |       |      |           |       |       |             |        |    |            |  |  |              |  |  |              |  |  |                   |  |  |                   |  |    |       |                  |    |         |                  |    |         |                  |    |         |                  |    |         |         |   |      |            |       |       |             |       |      |           |       |      |            |       |       |             |          |   |      |           |       |       |             |       |      |           |       |      |            |       |       |             |            |   |      |           |       |   |   |   |      |           |       |      |           |       |   |   |           |   |      |            |       |   |   |   |      |            |       |      |            |       |   |   |       |   |      |           |       |   |   |   |      |           |       |      |           |       |   |   |    |   |      |           |       |   |   |   |      |           |       |      |           |       |   |   |    |   |      |           |       |       |             |       |      |           |       |      |            |       |       |             |    |   |      |            |       |       |             |       |      |           |       |      |            |       |       |             |
| C1772T                        | No | T versus C                                                                                                                                                                                                                                                                                                                                                                                                                                                                                                                                                                                                                                                                                                                                                                                                                                                                                                                                                                                                                                                                                                                                                                                                                                                                                                                                                                                                                                                                                                                                                                                                                                                                                                                                                                                                                                                                                                                                                                                                                                                                                                                                                                                                                                                                                                                                                                                                                                                                                                                                                                                                                                                                                                                                                                                                                                                                                                                                                                                                                                                                                                                                                                                                                                                                                                                                                                                                                                                                                                                                                                                                                                                                                                                                                                                                                                                                                                                                                                                                                                                                                                                                                                                                                                                                                                                                                                                                                                                                                                                                                                                                                                                                                                                                                                                                                                                                                                                                                                                                                                                                                                                                                                                                                                                                                                                                                                                                                                                                                                                                                    |            |                  | TT versus CC |             |                  | TC versus CC |            |                  | TT + TC versus CC |            |                  | TT versus TC + CC |             |  |                   |  |    |       |                  |    |         |                  |    |         |                  |    |         |                  |    |         |         |   |      |           |       |      |           |       |      |           |       |      |           |       |       |            |          |   |      |           |       |      |           |       |      |           |       |      |           |       |       |            |            |   |      |           |       |   |   |   |      |           |       |      |           |       |   |   |           |   |      |           |       |      |           |       |      |           |       |      |           |       |      |           |       |   |      |           |       |   |   |   |      |           |       |      |           |       |   |   |    |   |      |           |       |   |   |   |      |           |       |      |           |       |   |   |    |   |      |           |       |      |           |       |      |           |       |      |           |       |       |             |    |   |      |           |       |      |           |       |      |           |       |      |           |       |       |             |        |    |            |  |  |              |  |  |              |  |  |                   |  |  |                   |  |    |       |                  |    |         |                  |    |         |                  |    |         |                  |    |         |         |   |      |            |       |       |             |       |      |           |       |      |            |       |       |             |          |   |      |           |       |       |             |       |      |           |       |      |            |       |       |             |            |   |      |           |       |   |   |   |      |           |       |      |           |       |   |   |           |   |      |            |       |   |   |   |      |            |       |      |            |       |   |   |       |   |      |           |       |   |   |   |      |           |       |      |           |       |   |   |    |   |      |           |       |   |   |   |      |           |       |      |           |       |   |   |    |   |      |           |       |       |             |       |      |           |       |      |            |       |       |             |    |   |      |            |       |       |             |       |      |           |       |      |            |       |       |             |



# PRISMA 2009 Checklist

|                             |    |                                                                                                                                                                                                                                                                                                                                                                                                                                                                                                                                                                                                                                                                                                                                                                                                                                                                                                                                                                                                                                                                                                                                                                                                                                                                                                                                                                                                |    |            |                  |                  |              |                  |                  |              |                  |                  |                   |                  |                  |                   |             |
|-----------------------------|----|------------------------------------------------------------------------------------------------------------------------------------------------------------------------------------------------------------------------------------------------------------------------------------------------------------------------------------------------------------------------------------------------------------------------------------------------------------------------------------------------------------------------------------------------------------------------------------------------------------------------------------------------------------------------------------------------------------------------------------------------------------------------------------------------------------------------------------------------------------------------------------------------------------------------------------------------------------------------------------------------------------------------------------------------------------------------------------------------------------------------------------------------------------------------------------------------------------------------------------------------------------------------------------------------------------------------------------------------------------------------------------------------|----|------------|------------------|------------------|--------------|------------------|------------------|--------------|------------------|------------------|-------------------|------------------|------------------|-------------------|-------------|
|                             |    |                                                                                                                                                                                                                                                                                                                                                                                                                                                                                                                                                                                                                                                                                                                                                                                                                                                                                                                                                                                                                                                                                                                                                                                                                                                                                                                                                                                                | OR | 95%CI      | P <sup>(z)</sup> | OR               | (95%CI)      | P <sup>(z)</sup> | OR               | (95%CI)      | P <sup>(z)</sup> | OR               | (95%CI)           | P <sup>(z)</sup> | OR               | (95%CI)           |             |
|                             |    | Overall                                                                                                                                                                                                                                                                                                                                                                                                                                                                                                                                                                                                                                                                                                                                                                                                                                                                                                                                                                                                                                                                                                                                                                                                                                                                                                                                                                                        | 7  | 1.66       | 0.92-2.99        | 0.095            | 2.27         | 1.17-4.42        | 0.016            | 0.98         | 0.70-1.38        | 0.914            | 1.16              | 0.85-1.59        | 0.355            | 11.53             | 1.11-120.4  |
|                             |    | PCR-RFLP                                                                                                                                                                                                                                                                                                                                                                                                                                                                                                                                                                                                                                                                                                                                                                                                                                                                                                                                                                                                                                                                                                                                                                                                                                                                                                                                                                                       | 4  | 2.44       | 0.90-6.64        | 0.081            | 2.27         | 1.17-4.42        | 0.016            | 0.86         | 0.55-1.34        | 0.506            | 1.14              | 0.78-1.67        | 0.503            | 11.53             | 1.11-120.4  |
|                             |    | Sequencing                                                                                                                                                                                                                                                                                                                                                                                                                                                                                                                                                                                                                                                                                                                                                                                                                                                                                                                                                                                                                                                                                                                                                                                                                                                                                                                                                                                     | 3  | 1.20       | 0.70-2.03        | 0.506            | —            | —                | —                | 1.20         | 0.69-2.09        | 0.514            | 1.20              | 0.69-2.09        | 0.514            | —                 | —           |
|                             |    | Caucasian                                                                                                                                                                                                                                                                                                                                                                                                                                                                                                                                                                                                                                                                                                                                                                                                                                                                                                                                                                                                                                                                                                                                                                                                                                                                                                                                                                                      | 2  | 1.26       | 0.84-1.90        | 0.270            | 2.16         | 1.09-4.27        | 0.028            | 0.69         | 0.40-1.17        | 0.168            | 1.02              | 0.66-1.57        | 0.926            | 2.28              | 1.15-5.51   |
|                             |    | Asian                                                                                                                                                                                                                                                                                                                                                                                                                                                                                                                                                                                                                                                                                                                                                                                                                                                                                                                                                                                                                                                                                                                                                                                                                                                                                                                                                                                          | 4  | 1.37       | 0.88-2.13        | 0.159            | —            | —                | —                | 1.30         | 0.82-2.07        | 0.269            | 1.34              | 0.85-2.12        | 0.213            | —                 | —           |
|                             |    | HB                                                                                                                                                                                                                                                                                                                                                                                                                                                                                                                                                                                                                                                                                                                                                                                                                                                                                                                                                                                                                                                                                                                                                                                                                                                                                                                                                                                             | 3  | 1.31       | 0.90-1.90        | 0.162            | —            | —                | —                | 0.92         | 0.57-1.48        | 0.736            | 1.13              | 0.73-1.74        | 0.582            | —                 | —           |
|                             |    | PB                                                                                                                                                                                                                                                                                                                                                                                                                                                                                                                                                                                                                                                                                                                                                                                                                                                                                                                                                                                                                                                                                                                                                                                                                                                                                                                                                                                             | 4  | 2.87       | 0.82-10.0        | 0.099            | 2.01         | 0.75-5.41        | 0.168            | 1.05         | 0.64-1.73        | 0.843            | 1.20              | 0.76-1.89        | 0.442            | 22.82             | 0.28-1887.8 |
|                             |    | OC                                                                                                                                                                                                                                                                                                                                                                                                                                                                                                                                                                                                                                                                                                                                                                                                                                                                                                                                                                                                                                                                                                                                                                                                                                                                                                                                                                                             | 5  | 1.95       | 0.70-5.43        | 0.201            | 2.01         | 0.75-5.41        | 0.168            | 0.89         | 0.57-1.40        | 0.612            | 1.01              | 0.66-1.54        | 0.957            | 22.82             | 0.28-1887.8 |
|                             |    | G1790A                                                                                                                                                                                                                                                                                                                                                                                                                                                                                                                                                                                                                                                                                                                                                                                                                                                                                                                                                                                                                                                                                                                                                                                                                                                                                                                                                                                         | No | A versus G |                  |                  | AA versus GG |                  |                  | AG versus GG |                  |                  | AA + AG versus GG |                  |                  | AA versus AG + GG |             |
|                             |    |                                                                                                                                                                                                                                                                                                                                                                                                                                                                                                                                                                                                                                                                                                                                                                                                                                                                                                                                                                                                                                                                                                                                                                                                                                                                                                                                                                                                |    | OR         | 95%CI            | P <sup>(z)</sup> | OR           | (95%CI)          | P <sup>(z)</sup> | OR           | (95%CI)          | P <sup>(z)</sup> | OR                | (95%CI)          | P <sup>(z)</sup> | OR                | (95%CI)     |
|                             |    | Overall                                                                                                                                                                                                                                                                                                                                                                                                                                                                                                                                                                                                                                                                                                                                                                                                                                                                                                                                                                                                                                                                                                                                                                                                                                                                                                                                                                                        | 6  | 4.11       | 0.84-20.15       | 0.081            | 72.11        | 2.08-2502.4      | 0.018            | 1.94         | 0.83-4.55        | 0.128            | 3.57              | 0.97-13.14       | 0.055            | 58.05             | 1.70-1985.8 |
|                             |    | PCR-RFLP                                                                                                                                                                                                                                                                                                                                                                                                                                                                                                                                                                                                                                                                                                                                                                                                                                                                                                                                                                                                                                                                                                                                                                                                                                                                                                                                                                                       | 4  | 8.39       | 0.98-72.1        | 0.053            | 72.11        | 2.08-2502.4      | 0.018            | 2.81         | 0.91-8.72        | 0.074            | 7.00              | 1.18-41.68       | 0.032            | 58.05             | 1.70-1985.8 |
|                             |    | Sequencing                                                                                                                                                                                                                                                                                                                                                                                                                                                                                                                                                                                                                                                                                                                                                                                                                                                                                                                                                                                                                                                                                                                                                                                                                                                                                                                                                                                     | 2  | 1.01       | 0.50-2.03        | 0.975            | —            | —                | —                | 1.01         | 0.50-2.06        | 0.975            | 1.01              | 0.50-2.06        | 0.975            | —                 | —           |
|                             |    | Caucasian                                                                                                                                                                                                                                                                                                                                                                                                                                                                                                                                                                                                                                                                                                                                                                                                                                                                                                                                                                                                                                                                                                                                                                                                                                                                                                                                                                                      | 2  | 2.18       | 0.16-30.19       | 0.562            | —            | —                | —                | 2.10         | 0.16-28.19       | 0.577            | 2.24              | 0.15-34.32       | 0.563            | —                 | —           |
|                             |    | Asian                                                                                                                                                                                                                                                                                                                                                                                                                                                                                                                                                                                                                                                                                                                                                                                                                                                                                                                                                                                                                                                                                                                                                                                                                                                                                                                                                                                          | 3  | 1.59       | 0.67-3.78        | 0.294            | —            | —                | —                | 1.57         | 0.69-3.58        | 0.283            | 1.59              | 0.67-3.76        | 0.290            | —                 | —           |
|                             |    | HB                                                                                                                                                                                                                                                                                                                                                                                                                                                                                                                                                                                                                                                                                                                                                                                                                                                                                                                                                                                                                                                                                                                                                                                                                                                                                                                                                                                             | 2  | 0.86       | 0.43-1.72        | 0.667            | —            | —                | —                | 0.85         | 0.42-1.73        | 0.660            | 0.85              | 0.42-1.73        | 0.660            | —                 | —           |
|                             |    | PB                                                                                                                                                                                                                                                                                                                                                                                                                                                                                                                                                                                                                                                                                                                                                                                                                                                                                                                                                                                                                                                                                                                                                                                                                                                                                                                                                                                             | 4  | 9.43       | 1.20-73.9        | 0.033            | 72.11        | 2.08-2502.4      | 0.018            | 3.22         | 1.28-8.08        | 0.013            | 7.83              | 1.48-41.37       | 0.015            | 58.05             | 1.70-1985.8 |
|                             |    | OC                                                                                                                                                                                                                                                                                                                                                                                                                                                                                                                                                                                                                                                                                                                                                                                                                                                                                                                                                                                                                                                                                                                                                                                                                                                                                                                                                                                             | 4  | 9.66       | 1.31-71.15       | 0.026            | 72.11        | 2.08-2502.4      | 0.018            | 3.17         | 1.26-7.92        | 0.014            | 7.92              | 1.58-39.64       | 0.012            | 58.05             | 1.70-1985.8 |
| Risk of bias across studies | 22 | Present results of any assessment of risk of bias across studies (see Item 15).                                                                                                                                                                                                                                                                                                                                                                                                                                                                                                                                                                                                                                                                                                                                                                                                                                                                                                                                                                                                                                                                                                                                                                                                                                                                                                                |    |            |                  |                  |              |                  |                  |              |                  |                  |                   |                  |                  |                   |             |
| Additional analysis         | 23 | <p>In the sensitivity analysis, no remarkable change was observed in the pooled ORs after omitting one article at a time.</p> <p>In the subgroup analyses of C1772T polymorphism, we found C1772T polymorphism could increase the HNC risk significantly in the polymerase chain reaction-restriction fragment length polymorphism (PCR-RFLP) genotyping method subgroup (OR = 2.27, 95% CI = 1.17-4.42 for homozygous model; OR = 11.53, 95% CI = 1.11-120.4 for recessive model). Moreover, a significant relationship could be discovered between C1772T polymorphism and an increased HNC risk for Caucasians (OR = 2.16, 95% CI = 1.09-4.27 for homozygous model; OR = 2.28, 95% CI = 1.15-5.51 for recessive model).</p> <p>In the stratified analyses of G1790A, a substantial relationship was observed for PCR-RFLP genotyping method subgroup (OR = 72.11, 95% CI = 2.08-2502.4 for homozygous model; OR = 7.00, 95% CI = 1.18-41.68 for dominant model; OR = 58.05, 95% CI = 1.70-1985.8 for recessive model), population-based study subgroup (OR = 9.43, 95% CI = 1.20-73.9 for allelic model, Figure 3; OR = 72.11, 95% CI = 2.08-2502.4 for homozygous model; OR = 3.22, 95% CI = 1.28-8.08 for heterozygous model; OR = 7.83, 95% CI = 1.48-41.37 for dominant model; OR = 58.05, 95% CI = 1.70-1985.8 for recessive model) and OC (P &lt; 0.05 under all genetic models).</p> |    |            |                  |                  |              |                  |                  |              |                  |                  |                   |                  |                  |                   |             |

## DISCUSSION

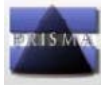

## PRISMA 2009 Checklist

|                     |    |                                                                                                                                                                                                                                                                                                                                                                                                                                                                                                                                                                                                                                                        |
|---------------------|----|--------------------------------------------------------------------------------------------------------------------------------------------------------------------------------------------------------------------------------------------------------------------------------------------------------------------------------------------------------------------------------------------------------------------------------------------------------------------------------------------------------------------------------------------------------------------------------------------------------------------------------------------------------|
| Summary of evidence | 24 | The study discovered that HIF-1 $\alpha$ C1772T and G1790A polymorphisms were significantly related to the susceptibility to HNC. Moreover, we found that C1772T polymorphism could statistically increase the HNC risk among Caucasians at the first time. In addition, HIF-1 $\alpha$ G1790A polymorphism was remarkably related to a higher risk of HNC, especially with OC.                                                                                                                                                                                                                                                                        |
| Limitations         | 25 | Some inevitable limitations existed in the meta-analysis. Firstly, the sample size in some subgroup was small, so the results from certain subgroup analysis could not have sufficient power to confirm the relationship. Secondly, publication bias might exist because several eligible articles that have not published were not enrolled in our study. Thirdly, the subgroup analyses by age, gender, alcohol, smoking, or other variables were not performed because of information limitation. Therefore, it is necessary to study the role of HIF-1 $\alpha$ C1772T and G1790A polymorphisms in HNC risk with more data and larger sample size. |
| Conclusions         | 26 | In conclusion, the study discovered that HIF-1 $\alpha$ C1772T and G1790A polymorphisms were significantly related to the susceptibility to HNC. Moreover, we found that C1772T polymorphism could statistically increase the HNC risk among Caucasians at the first time. In addition, HIF-1 $\alpha$ G1790A polymorphism was remarkably related to a higher risk of HNC, especially with OC. However, further well-designed papers with larger sample size are required to confirm our results.                                                                                                                                                      |
| <b>FUNDING</b>      |    |                                                                                                                                                                                                                                                                                                                                                                                                                                                                                                                                                                                                                                                        |
| Funding             | 27 | No funding in our paper.                                                                                                                                                                                                                                                                                                                                                                                                                                                                                                                                                                                                                               |

From: Moher D, Liberati A, Tetzlaff J, Altman DG, The PRISMA Group (2009). Preferred Reporting Items for Systematic Reviews and Meta-Analyses: The PRISMA Statement. PLoS Med 6(7): e1000097. doi:10.1371/journal.pmed1000097

For more information, visit: [www.prisma-statement.org](http://www.prisma-statement.org).
