# Supplementary material for: Correlation between hypoxia-inducible factor-1α C1772T/G1790A polymorphisms and head and neck cancer risk: a meta-analysis
Source: PubMed Central journal article supplement (PMC8278760; doi:10.1186/s12957-021-02324-0), 2021-07-13
Supplement: 12957_2021_2324_MOESM2_ESM.pdf [file 12957_2021_2324_MOESM2_ESM.pdf]

**Table Supplementary 1. Quality assessment of included studies (Newcastle-Ottawa Scale)**

| Study           | Selection                    |                                 | Comparability                 |                                |                                                   | Exposure            |                                               | Score |                   |
|-----------------|------------------------------|---------------------------------|-------------------------------|--------------------------------|---------------------------------------------------|---------------------|-----------------------------------------------|-------|-------------------|
|                 | Adequate definition of cases | Representativeness of the cases | Selection of control subjects | Definition of control subjects | Control for important factor or additional factor | Exposure assessment | Same method of ascertainment for all subjects |       | Non-response rate |
| Mera-Menendez F | 1                            | 0                               | 0                             | 1                              | 2                                                 | 1                   | 1                                             | 0     | 6                 |
| Shieh TM        | 1                            | 1                               | 0                             | 1                              | 2                                                 | 1                   | 1                                             | 0     | 7                 |
| Chen MK         | 1                            | 1                               | 1                             | 1                              | 1                                                 | 1                   | 1                                             | 0     | 7                 |
| Munoz-Guerra MF | 1                            | 1                               | 0                             | 1                              | 1                                                 | 1                   | 1                                             | 1     | 7                 |
| Tanimoto K      | 1                            | 0                               | 1                             | 1                              | 1                                                 | 1                   | 1                                             | 0     | 6                 |
| Prasad J        | 1                            | 0                               | 0                             | 1                              | 2                                                 | 1                   | 1                                             | 0     | 6                 |
| Alves LR        | 1                            | 0                               | 0                             | 1                              | 1                                                 | 1                   | 1                                             | 0     | 5                 |

**Table Supplementary 2. The risk of bias of included studies on the basis of the OHAT.**

| Study           | Selection Bias    | Confounding Bias    | Exclusion Bias        | Detection Bias            |                    |                  | Other Bias |
|-----------------|-------------------|---------------------|-----------------------|---------------------------|--------------------|------------------|------------|
|                 | Comparison groups | Variable assessment | Outcome data complete | Exposure characterization | Outcome assessment | Outcome reported |            |
| Mera-Menendez F | ++                | ++                  | +                     | ++                        | ++                 | ++               | +          |
| Shieh TM        | ++                | NR                  | NR                    | +                         | +                  | ++               | +          |
| Chen MK         | ++                | NR                  | +                     | ++                        | ++                 | ++               | +          |
| Munoz-Guerra MF | ++                | +                   | +                     | ++                        | ++                 | ++               | +          |
| Tanimoto K      | ++                | NR                  | NR                    | ++                        | ++                 | +                | +          |
| Prasad J        | ++                | NR                  | NR                    | ++                        | ++                 | +                | +          |
| Alves LR        | ++                | +                   | NR                    | ++                        | ++                 | ++               | +          |

++ definitely low risk of bias

+ probably low risk of bias

NR probably high risk of bias
